1 **Fine-mapping the consequences of site-specific glycan installation by shotgun**  
2 **scanning glycomutagenesis**

3

4 Mingji Li<sup>1†</sup>, Xiaolu Zheng<sup>1†</sup>, Sudhanshu Shanker<sup>2</sup>, Thapakorn Jaroentomeechai<sup>1</sup>, Ilkay  
5 Koçer<sup>1</sup>, Josef Byrne<sup>1</sup>, Emily C. Cox<sup>3</sup>, Qin Fu<sup>4</sup>, Sheng Zhang<sup>4</sup>, Jason W. Labonte<sup>2,5</sup>, Jeffrey  
6 J. Gray<sup>2\*</sup> and Matthew P. DeLisa<sup>1,3,4\*</sup>

7

8 <sup>1</sup>Robert F. Smith School of Chemical and Biomolecular Engineering, Cornell University,  
9 Ithaca, New York 14853 USA

10 <sup>2</sup>Department of Chemical and Biomolecular Engineering, Johns Hopkins University,  
11 Baltimore, Maryland 21218 USA

12 <sup>3</sup>Biomedical and Biological Sciences, College of Veterinary Medicine, Cornell University,  
13 Ithaca, New York 14853 USA

14 <sup>4</sup>Cornell Institute of Biotechnology, Cornell University, Ithaca, New York 14853 USA

15 <sup>5</sup>Department of Chemistry, Franklin & Marshall College, Lancaster, Pennsylvania 17604  
16 USA

17

18 \*Address correspondence to: (1) Matthew P. DeLisa, Robert Frederick Smith School of  
19 Chemical and Biomolecular Engineering, Cornell University, Ithaca, NY 14853 USA. Tel:  
20 607-254-8560; Email: [md255@cornell.edu](mailto:md255@cornell.edu); and (2) Jeffrey J. Gray, Department of  
21 Chemical and Biomolecular Engineering, Johns Hopkins University, Baltimore, Maryland  
22 21218 USA. Tel: 410-516-5313; Email: [jgray@jhu.edu](mailto:jgray@jhu.edu).

23

24 †These authors contributed equally to this work.

25

26

27

28

29

30

31

1 **Abstract**

2 *N*-linked glycosylation serves to diversify the proteome and is crucial for the folding and  
3 activity of numerous cellular proteins. Consequently, there is great interest in uncovering  
4 the rules that govern how glycosylation modulates protein properties so that the effects  
5 of site-specific glycosylation can be rationally exploited and eventually even predicted.  
6 Towards this goal, we describe a combinatorial strategy termed shotgun scanning  
7 glycomutagenesis (SSGM) that enables systematic investigation of the structural and  
8 functional consequences of glycan installation along a protein backbone. The utility of this  
9 approach was demonstrated with three different acceptor proteins, namely bacterial  
10 immunity protein Im7, bovine pancreatic ribonuclease A, and a human anti-HER2 single-  
11 chain Fv antibody, all of which were found to tolerate *N*-glycan attachment at a large  
12 number of positions and with relatively high efficiency. The stability and activity of many  
13 glycovariants was measurably altered by the *N*-linked glycan in a manner that critically  
14 depended on the precise location of the modification. Comparison of the results with  
15 calculations of simple geometrics and Rosetta energies suggested that glycosylation  
16 effects on protein activity may be predictable. By enabling a workflow for mapping glycan-  
17 mediated effects on acceptor proteins, glycomutagenesis opens up possibilities for  
18 accessing unexplored regions of glycoprotein structural space and engineering protein  
19 variants with designer biophysical and biological properties.

20

21

22

23

24

25

26

27

28

29

30

31

## 1 Introduction

2 Glycosylation of asparagine residues is one of the most abundant and structurally  
3 complex protein post-translational modifications <sup>1, 2</sup> and occurs in all domains of life <sup>3</sup>.  
4 Owing to their relatively large size and hydrophilicity or simply their presence at definite  
5 locations, asparagine-linked (*N*-linked) glycans can significantly alter protein properties  
6 including biological activity, chemical solubility, folding and stability, immunogenicity, and  
7 serum half-life.<sup>4, 5</sup> Hence, glycosylation effectively increases the diversity of the proteome  
8 by enriching the repertoire of protein characteristics beyond that dictated by the twenty  
9 canonical amino acids. For example, accumulating evidence indicates that the immune  
10 system diversifies the repertoire of antigen specificities by exclusively targeting the  
11 antigen-binding sites of immunoglobulins (IgGs) with post-translational modifications, in  
12 particular *N*-linked glycosylation <sup>6</sup>. Moreover, the profound effect of glycans on proteins has  
13 prompted widespread glycoengineering efforts to rationally manipulate key glycosylation  
14 parameters (*e.g.*, glycan size and structural composition, glycosite location and  
15 occupancy) as a means to optimize therapeutic proteins, vaccine formulations, and  
16 industrial enzymes <sup>7-10</sup>. Despite some notable successes, the routine use of glycosylation  
17 as a strategy for engineering proteins with advantageous properties is currently limited by  
18 our inability to generalize and predict how glycosylation affects protein structure and  
19 function.

20 Indeed, deciphering the “glycosylation code” that defines the interplay between a  
21 glycan and its underlying acceptor protein represents a grand challenge that requires  
22 access to large collections of chemically defined glycoproteins in sufficient quantities for  
23 characterization <sup>11</sup>. Such products are difficult to obtain because of the intrinsic variability  
24 with respect to the site of glycan attachment (macroheterogeneity) and glycan structure  
25 (microheterogeneity). This variability stems from the untemplated nature of glycosylation,  
26 which, unlike protein synthesis that involves a coding template, is defined by the relative  
27 activities of a number of glycosyltransferase enzymes. One way to circumvent this issue  
28 is through computational approaches that enable *in silico* exploration of glycosylation-  
29 induced effects on protein folding and stability <sup>12, 13</sup>; however, these involve a trade-off  
30 between molecular detail and glycoprotein size, with full-atomistic molecular dynamics  
31 simulations typically limited to only short glycopeptides (~10 residues) <sup>12</sup>. Another option

1 is chemical synthesis, which can furnish defined glycopeptides for investigating the local  
2 effects of *N*-linked glycans on peptide conformation <sup>14</sup>. Although this approach is also not  
3 amenable to full-length proteins, advances in expressed protein ligation (EPL) have  
4 opened the door to convergent assembly of chemically synthesized glycopeptides with  
5 recombinantly expressed protein domains to form larger glycoproteins bearing complex  
6 *N*-glycans installed at discrete sites <sup>15</sup>. Using this technology, Imperiali and colleagues  
7 created a panel of seven site-specifically glycosylated variants of the bacterial immunity  
8 protein Im7 modified with the disaccharide *N,N'*-diacetylchitobiose (GlcNAc<sub>2</sub>) and  
9 assessed the kinetic and thermodynamic consequences of glycan installation at defined  
10 locations <sup>16</sup>. Unfortunately, EPL is a technically demanding procedure, requiring manual  
11 construction of each individual glycoprotein and thus limiting the number of testable  
12 glycosite designs to just a small handful. Hence, there remains an unmet need for  
13 scalable techniques that can rapidly supply large collections of discretely glycosylated  
14 proteins for investigating the influence of *N*-glycans on the properties of conformationally  
15 complex proteins.

16       Herein, we describe shotgun scanning glycomutagenesis (SSGM), a reliable and  
17 generalizable workflow for fine-mapping the effects of site-specific glycan installation at  
18 every possible location of a protein backbone (**Fig. 1**). SSGM is inspired by protein  
19 engineering methods based on alanine-scanning mutagenesis that have proven useful  
20 for probing the contributions of individual amino acid sidechains to the properties of  
21 proteins <sup>17</sup>. In combinatorial variations of this method, rather than requiring many mutant  
22 proteins to be manually produced and separately characterized, combinatorial protein  
23 libraries are used in conjunction with high-throughput screens or selections thereby  
24 enabling a single library to simultaneously provide information about many different  
25 residues <sup>18, 19</sup>. Along conceptually similar lines, SSGM is a glycoprotein-focused method  
26 that involves design and construction of combinatorial acceptor protein libraries whereby:  
27 (i) each member of the library carries a single *N*-glycosite “mutation” introduced at a  
28 defined position along the protein backbone; and (ii) the complete ensemble of glycan  
29 acceptor sites (sequons) in the library effectively covers every possible position in the  
30 target protein. The resulting SSGM libraries are expressed using *N*-glycosylation-  
31 competent bacteria in the context of glycoSNAP (glycosylation of secreted N-linked

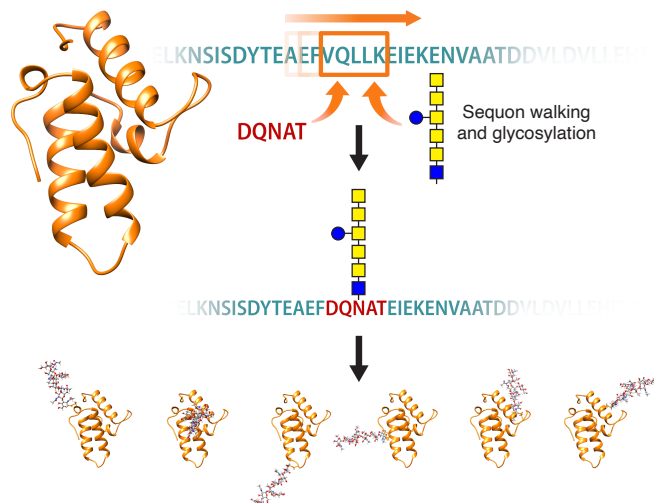

1  
2 **Figure 1. Fine-mapping the effects of glycan installation.** Schematic of shotgun scanning  
3 glycomutagenesis (SSGM), a glycoprotein engineering method based on combinatorial protein libraries in  
4 which glycosylation “sequon walking” is used to introduce an acceptor site at every possible position along  
5 the protein backbone. Note that the multi-residue nature of a sequon (e.g., N-X-S/T or D/E-X<sub>1</sub>-N-X<sub>2</sub>-S/T  
6 where X, X<sub>1</sub>, X<sub>2</sub> ≠ P) necessitates insertion or replacement of up to four additional amino acid substitutions  
7 at each position. The resulting library is expressed in glycoengineered bacteria, providing an opportunity  
8 for each library member to be expressed and glycosylated in a manner that is compatible with high-  
9 throughput screening via glycoSNAP to interrogate the glycosylation phenotype of individual variants. By  
10 integrating bacterial SSGM libraries with multiplexable assays, the biochemical and biophysical properties  
11 of each glycovariant can be individually interrogated.  
12

13 acceptor proteins)<sup>20</sup>, a versatile high-throughput screen based on glycosylation and  
14 extracellular secretion of the small (10 kDa in its mature form) *Escherichia coli* protein  
15 YebF<sup>21</sup>.

16 Using this new glycoprotein engineering tool, we constructed and screened three  
17 different SSGM libraries corresponding to bacterial immunity protein Im7, bovine  
18 pancreatic ribonuclease A (RNase A), and a human single-chain Fv antibody specific for  
19 HER2 (scFv-HER2). Our results revealed that installation of *N*-glycans was tolerated at a  
20 large number of positions and within all types of secondary structure, and the observed  
21 *N*-glycosylation efficiency was quite high in the majority of cases. For many of these  
22 glycovariants, the presence of *N*-glycans significantly impacted protein stability and/or  
23 activity in a manner that critically depended on the precise location of the modification.  
24 We computed simple geometric measures and Rosetta energetic estimates<sup>22, 23</sup> and  
25 assessed which factors correlated with the sequon substitution or glycosylation effects on  
26 stability and activity. Taken together, these findings demonstrate the utility of SSGM for  
27 rapidly cataloging the biological and biophysical effects of *N*-glycan installation at single

1 amino acid resolution and in a protein-agnostic manner, thereby opening the door to  
2 largely unexplored regions of glycoprotein structural space and providing a new tool for  
3 engineering protein variants with advantageous properties.

4

## 5 **Results**

6 **Reliable detection of acceptor protein glycosylation by glycoSNAP screening.** To  
7 enable screening of SSGM libraries, we hypothesized that target proteins of interest could  
8 be fused to YebF and subsequently interrogated for *N*-glycosylation in a high-throughput  
9 fashion by glycoSNAP screening (**Fig. 2a**). Briefly, YebF modified with an artificial  
10 glycosite (e.g., N-X-S/T or D/E-X<sub>1</sub>-N-X<sub>2</sub>-S/T where X, X<sub>1</sub>, X<sub>2</sub> ≠ P) is expressed in the  
11 presence of heterologous *N*-glycosylation machinery in *E. coli* cells that are bound to a  
12 nitrocellulose filter membrane. Following secretion out of filter-bound colonies, putatively  
13 glycosylated YebF is captured on a second nitrocellulose membrane, which is probed  
14 with antibodies or lectins to detect *N*-linked glycans. In this way, glycoSNAP creates a  
15 convenient genotype–glycophenotype linkage for facile scoring (glycosylated versus  
16 aglycosylated) of YebF proteins secreted from individual bacterial colonies. We initially  
17 focused on *E. coli* Im7 for several reasons: (i) it is a small, globular 87-residue protein  
18 that lacks disulfide bonds and is well expressed in the periplasm where bacterial *N*-  
19 glycosylation occurs<sup>24</sup>; (ii) although not a native glycoprotein, Im7 modified at its C-  
20 terminus with a DQNAT glycosylation tag has been glycosylated by the *Campylobacter*  
21 *jejuni* *N*-glycosylation machinery in *E. coli*<sup>24</sup>; (iii) crystal structures are available for wild-  
22 type (wt) Im7<sup>25</sup> and for Im7 in complex with its cognate toxin colicin E7 (ColE7)<sup>26</sup>; and  
23 (iv) a limited set of seven Im7 variants was previously generated to determine the effects  
24 of GlcNAc<sub>2</sub> attachment on folding and stability<sup>16</sup>, providing some useful reference points  
25 for comparison.

26 To determine whether Im7 was compatible with the glycoSNAP procedure, *E. coli*  
27 strain CLM24 was co-transformed with a plasmid encoding YebF-Im7 that was modified  
28 at its C-terminus with a DQNAT glycosylation tag<sup>27</sup> along with two additional plasmids,  
29 one encoding glycosyltransferase (GT) enzymes for the biosynthesis of the *N*-glycan and  
30 the other encoding the oligosaccharyltransferase (OST) for transfer of the resulting *N*-  
31 glycan to acceptor proteins. To minimize microheterogeneity so that modified acceptor

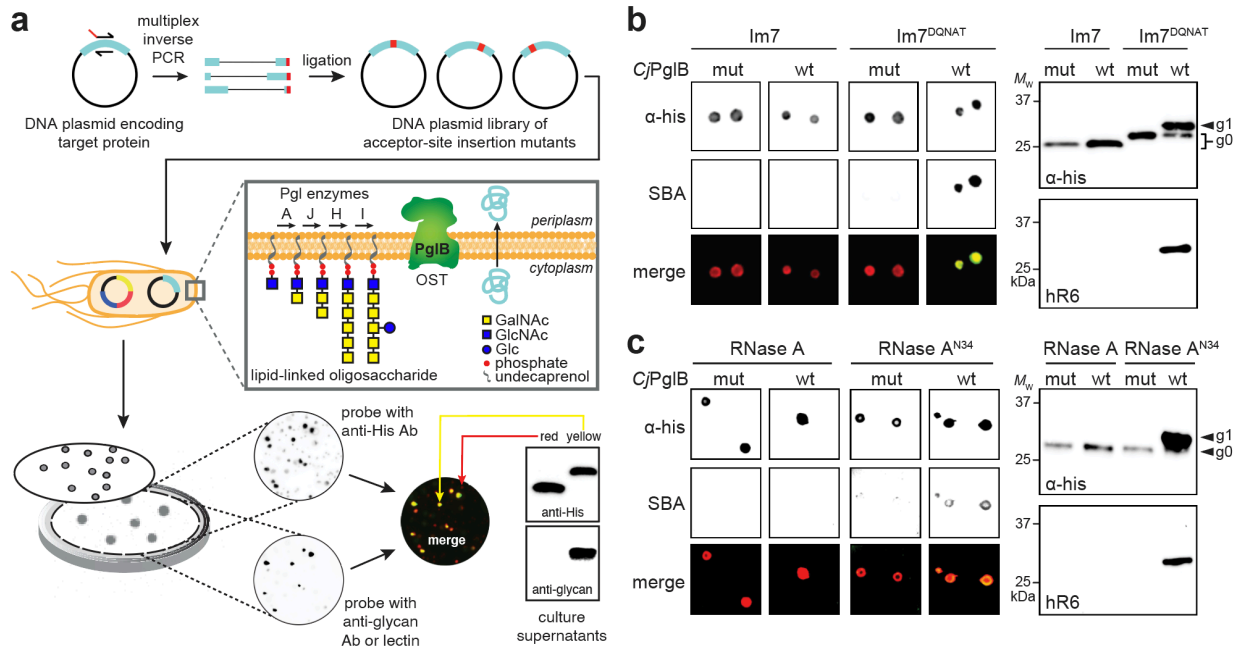

1  
2 **Figure 2. Construction and interrogation of SSGM libraries.** (a) Schematic of SSGM library construction  
3 using multiplex inverse PCR approach. The resulting plasmid library, encoding acceptor protein variants  
4 with glycosite substitutions at every possible position, was used to co-transform *E. coli* strain CLM24 along  
5 with two additional plasmids encoding the requisite *N*-glycosylation machinery from *C. jejuni*. The resulting  
6 bacterial library was plated on solid agar, after which colonies and their secreted glycoproteins were replica  
7 plated on nitrocellulose membranes as described in the text. (b) Immunoblot analysis of acceptor proteins  
8 in colony secretions (left) and extracellular supernatant fractions (right) derived from *E. coli* CLM24 carrying  
9 a plasmid encoding either YebF-Im7 or YebF-Im7<sup>DQNAT</sup> along with plasmids encoding *N*-glycosylation  
10 machinery with either wild-type CjPglB (wt) or an inactive mutant (mut). (c) Same as in (b) but with YebF-  
11 RNase A and YebF-RNase A<sup>N34</sup> in colony secretions (left) and periplasmic fractions (right). Blots were  
12 probed with anti-polyhistidine antibody (α-His) to detect acceptor protein and SBA or hR6 serum to detect  
13 the glycan. Bottom color panels in (b) and (c) depict overlay of α-His and SBA blots (merge). Arrows denote  
14 aglycosylated (g0) and singly glycosylated (g1) forms of YebF-Im7<sup>DQNAT</sup> or YebF-RNase A<sup>N34</sup>. Molecular  
15 weight (*M<sub>w</sub>*) markers are indicated at left. Results are representative of at least three biological replicates.

16  
17 proteins all carried identical glycans, we created a system for producing homogeneous  
18 *N*-glycans with the structure GalNAc<sub>5</sub>(Glc)GlcNAc, which is one of several structurally  
19 related glycan donors that can be efficiently transferred to target proteins in *E. coli* by the  
20 *C. jejuni* OST PglB (CjPglB)<sup>28, 29</sup>. This is significant because it enables differences in  
21 glycosylation efficiency to be attributed to accessibility of a given acceptor site rather than  
22 poor compatibility between the lipid-linked oligosaccharide (LLO) donor and the OST.

23 When plated on solid agar and subjected to the colony-blotting method, cells  
24 expressing YebF-Im7<sup>DQNAT</sup>, or a control YebF-Im7 construct that lacked the glycosylation  
25 tag, were able to secrete the fusion into the extracellular medium as evidenced by cross-  
26 reaction of an anti-His antibody with the membranes (**Fig. 2b**). However, only the strain

1 expressing YebF-Im7<sup>DQNAT</sup> in the presence of wt CjPglB, but not a CjPglB variant  
2 rendered inactive by two active-site mutations (D54N and E316Q)<sup>20</sup>, gave rise to colonies  
3 that reacted with soybean agglutinin (SBA) (**Fig. 2b**), a lectin that binds terminal GalNAc  
4 residues in the minimal *C. jejuni* N-glycan<sup>28</sup>. The colony blotting results were  
5 corroborated by immunoblot analysis of culture supernatants, which revealed that YebF-  
6 Im7 and YebF-Im7<sup>DQNAT</sup> were both secreted into the extracellular medium but only the  
7 latter was glycosylated as evidenced by the appearance of a higher molecular weight  
8 band in the blot probed with glycan-specific antiserum (**Fig. 2b**). As expected, no glycan-  
9 specific signal was detected in colony blots or immunoblots corresponding to cells  
10 carrying the mutant CjPglB enzyme (**Fig. 2b**). Importantly, the predominant glycan  
11 attached to YebF-Im7<sup>DQNAT</sup> corresponded to GalNAc<sub>5</sub>(Glc)GlcNAc, which represented  
12 >98% of all detected glycoforms as confirmed by mass spectrometry (**Supplementary**  
13 **Fig. 1**). Collectively, these results confirmed the compatibility of bacterial Im7 with our  
14 glycosylation workflow, yielding homogeneously modified acceptor proteins that were  
15 readily detected by glycoSNAP screening.

16 **Rapid identification of acceptor site permissiveness using SSGM.** Next, the plasmid  
17 encoding YebF-Im7 was mutagenized to create a library of Im7 gene sequences, each  
18 carrying an individual sequon substitution and cumulatively covering all positions in the  
19 Im7 protein. Mutagenesis was performed using multiplex inverse PCR<sup>30</sup> with a set of  
20 divergent abutting primers that were designed to amplify the entire plasmid and introduce  
21 an acceptor asparagine residue at every position in the Im7 gene (with the two upstream  
22 and two downstream residues being changed to DQ and AT, respectively), thereby  
23 yielding a highly focused plasmid library enriched with in-frame clones each bearing a  
24 single DQNAT acceptor motif at a defined position (**Fig. 2a**). The resulting plasmid library  
25 was introduced into strain CLM24 carrying the requisite N-glycosylation machinery, after  
26 which the library-transformed cells were plated on solid agar and subjected to glycoSNAP  
27 screening. From one membrane, we detected a total of ~200 glycosylation-positive  
28 colonies, of which 20 were randomly chosen for further analysis. Sequencing confirmed  
29 that a single in-frame DQNAT motif was present in each isolated hit, with the Im7<sup>N37</sup> and  
30 Im7<sup>N58</sup> variants (where the superscript denotes the location of the asparagine residue)  
31 occurring three and two times, respectively (**Fig. 3a**). The hits were fairly evenly



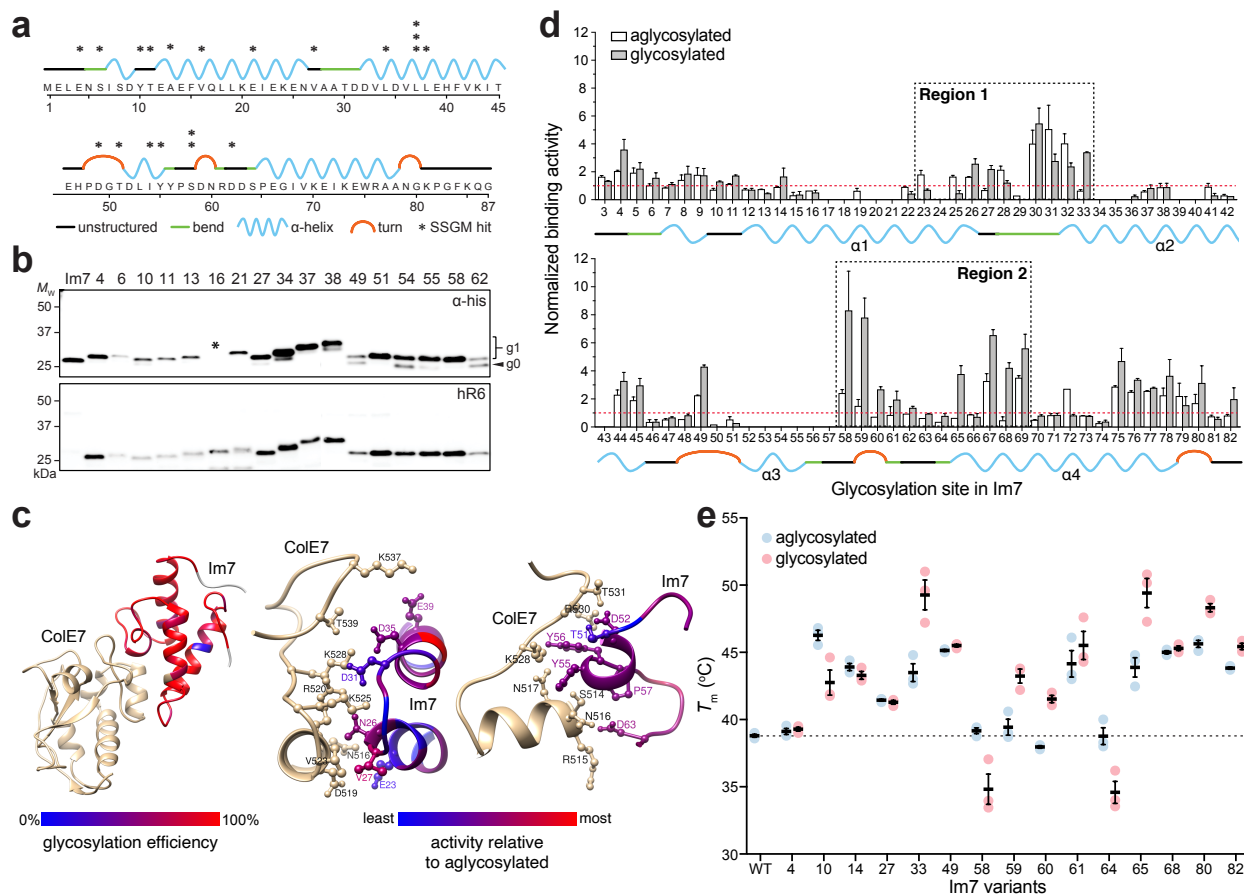

1  
2 **Figure 3. Exhaustive N-glycosylation of bacterial Im7 and its consequences.** (a) Primary sequence  
3 and predicted secondary structure for *E. coli* Im7 immunity protein. Asterisks denote location and frequency  
4 of glycosite hits isolated using SSGM. Predicted structures adapted from PDB ID 1AYI. (b) Immunoblot  
5 analysis of supernatant fractions from CLM24 cells carrying plasmids encoding YebF-Im7 fusions with  
6 sequon mutations at indicated position and requisite N-glycosylation machinery. Blots were probed with  
7 anti-polyhistidine antibody ( $\alpha$ -His) to detect acceptor protein (top panel) and hR6 serum against the glycan  
8 (bottom panel). Markers for aglycosylated (g0) and singly glycosylated (g1) forms of acceptor proteins are  
9 indicated at right. Molecular weight ( $M_w$ ) markers are indicated at left. Asterisk indicates construct with  
10 mutation that introduced stop codon just before 6xHis tag, preventing  $\alpha$ -His detection. Results are  
11 representative of at least three biological replicates. (c) Mapping of *in vivo* glycosylation efficiency onto  
12 three-dimensional structure of Im7 in complex with ColE7 (left). Heatmap analysis of the glycosylation  
13 efficiency was determined based on densitometric quantification of the percent glycosylated (defined as  
14  $g1/[g0+g1]$  ratio) for each acceptor protein in the anti-His immunoblot. Detailed interactions between ColE7  
15 and Im7, highlighting sidechains of Im7 in the regions of  $\alpha$ 1-loop12- $\alpha$ 2 (residues 19-39; middle) and loop23-  
16  $\alpha$ 3-loop34 (residues 46-63; right). Heatmap analysis of change in binding activity was determined by  
17 normalizing activity measured for glycosylated sequon variant by aglycosylated counterpart. (d) Binding  
18 activity of glycosylated (gray bars) and aglycosylated (white bars) YebF-Im7 variants recovered from  
19 supernatants was measured by ELISA with ColE7 as immobilized antigen. All data were normalized to  
20 binding activity measured for aglycosylated YebF-Im7 lacking a sequon (wt), such that values greater than  
21 1 (denoted by dashed red line) indicate enhanced binding activity relative to wt Im7. Dashed boxes  
22 correspond to two regions (Region 1: residues 23-33; Region 2: residues 58-69) that have many variants  
23 with increased activity. Data are average of three biological replicates and error bars represent standard  
24 deviation of the mean. (e) DSF analysis of 15 most active YebF-Im7 variants with and without glycosylation.  
25  $T_m$  calculated as midpoint of thermal transition between native and unfolded states. Dashed line indicates  
26  $T_m$  for wt YebF-Im7 ( $38.6 \pm 1.0$  °C). Black bars are average of three independent replicates with error  
27 bars reported as standard error of the mean.

1 distributed throughout the entire Im7 sequence and situated in every type of secondary  
2 structure including bends, turns, and  $\alpha$ -helices, consistent with X-ray crystallographic data  
3 showing that occupied glycosylation sites can occur on all secondary structural elements  
4 <sup>31</sup>. Immunoblot analysis confirmed that each of the selected clones was efficiently  
5 glycosylated (**Fig. 3b**).

6 To exhaustively explore glycosylation sequence space, we manually constructed  
7 all possible individual Im7 sequon variants (80 in total) using the multiplex PCR primer  
8 pairs to introduce DQNAT sequons at every position of the protein. A strikingly large  
9 number (79 out of 80) of these variants were found to be glycosylated, many with an  
10 efficiency that was at or near 100% as estimated from densitometry of the anti-His blot  
11 (**Fig. 3c** and **Supplementary Fig. 2a**). Because glycosylation by CjPglB can occur both  
12 before and after protein folding is completed (**Supplementary Fig. 2b**) <sup>32, 33</sup>, the  
13 secondary and tertiary structure around a glycosylation site is likely to have a direct effect  
14 on the extent to which a given site is occupied, if at all. Indeed, it has been observed that  
15 sequons located in structurally defined regions of folded acceptor proteins are poorly  
16 glycosylated and that partial unfolding is required to increase glycosylation efficiency at  
17 these sites <sup>33, 34</sup>. To determine if the structural context for any of the Im7 sequon variants  
18 was a determinant for the timing and efficiency of glycosylation, we performed *in vitro*  
19 glycosylation reactions in which already folded but yet-to-be glycosylated YebF-Im7  
20 proteins derived from culture supernatants were incubated with purified CjPglB and  
21 glycan donor. Remarkably, there was near perfect agreement between the *in vitro* and *in*  
22 *vivo* glycosylation results, with nearly all of the purified Im7 variants undergoing highly  
23 efficient glycosylation that was at or near 100% with few exceptions (**Supplementary Fig.**  
24 **2a**). The observation that so many Im7 variants were efficiently glycosylated by the  
25 CjPglB enzyme *in vitro* (*i.e.*, after folding had been completed) indicates that each sequon  
26 was located in either a structurally compliant position (*e.g.*, flexible and surface-exposed  
27 loops) within the folded protein or in a region of the protein that became partially unfolded  
28 during the *in vitro* glycosylation reaction. While broad accessibility is certainly plausible  
29 given the small size and simple topology of Im7, we cannot rule out the contribution of  
30 conformational destabilizing effects caused by replacement of five-residue stretches of  
31 native amino acids in the protein. Regardless of the exact reason, these results indicate

1 that Im7 was extremely tolerant to the installation of *N*-glycans over its entire structure  
2 both *in vivo* and *in vitro*.

3 **Structural and functional consequences of Im7 glycosylation.** To exhaustively  
4 determine the effect of glycan attachment on acceptor protein properties, we first  
5 quantified binding activity of all 80 Im7 sequon variants with and without glycosylation  
6 by subjecting each to multiwell enzyme-linked immunosorbent assay (ELISA) using  
7 purified ColE7 as immobilized antigen. Native Im7 interacts with ColE7, a 60-kDa  
8 bacterial toxin that is cytotoxic in the absence of the cognate Im7 inhibitor<sup>35</sup>. With an  
9 eye towards multiplexibility, we chose to assay YebF-Im7 fusions directly because: (i)  
10 it obviated the need for molecular reformatting of the expression constructs; (ii) the  
11 fusions could be isolated as relatively pure species from cell-free supernatants,  
12 bypassing the need for extensive purification; and (iii) the introduction of the small YebF  
13 domain had no measurable effect on ColE7-binding activity (**Supplementary Fig. 3a**).  
14 Whereas nearly two thirds of the YebF-Im7 fusions were either unaffected by  
15 glycosylation or rendered inactive by introduction of the DQNAT motif alone, particularly  
16 in a contiguous stretch between residues 50-57 of Im7, the remaining one third exhibited  
17 significantly altered binding activity that was attributable to the presence of the *N*-glycan  
18 (**Fig. 3d**). These glycosylation-induced effects were clearly dependent on the precise  
19 location of the modification. Indeed, some of the most striking increases in binding activity  
20 for glycosylated variants over their aglycosylated counterparts were observed to occur at  
21 the transition between different types of secondary structure (*e.g.*, variants Im7<sup>N33</sup>, Im7<sup>N58</sup>  
22 and Im7<sup>N65</sup>). These results were particularly noteworthy in light of the elevated probability  
23 of finding naturally occurring sequons in locations where secondary structure changes<sup>31</sup>.

24 Among the Im7 glycovariants whose activity was most significantly affected both  
25 positively and negatively by *N*-glycosylation, the majority were located in two distinct  
26 regions covering residues 23–33 and 58–69 (**Fig. 3d**). These regions occurred within the  
27 two arms of Im7 (one located in  $\alpha$ 1–loop12– $\alpha$ 2 from residue 19 to 39 and the other in  
28 loop23– $\alpha$ 3–loop34 from residue 46 to 63) that interact extensively with a continuous  
29 region in ColE7 in the crystal structure (**Fig. 3c**)<sup>26</sup>. The two interfaces are charge-  
30 complementary, and charge interactions are largely responsible for the tight and specific  
31 binding between the two proteins; hence, it was not surprising that binding activity was

1 sensitive to *N*-glycan attachment in the vicinity of these interfaces. It should be pointed  
2 out that the presence of an *N*-glycan in some of these positions was uniquely modulatory,  
3 as substitution of DQNAT alone in these same locations generally had little effect on  
4 activity, as evidenced by the comparable ColE7 binding measured for aglycosylated Im7  
5 variants versus wt Im7 (**Supplementary Fig. 3b**).

6 To determine whether any of the glycosylation-induced increases in binding activity  
7 were related to stabilization of the native fold, the most active Im7 glycovariants were  
8 subjected to differential scanning fluorimetry (DSF) with SYPRO Orange dye in a real-  
9 time PCR instrument. Previous studies showed that melting temperature ( $T_m$ ) values  
10 obtained by DSF correlated well with those determined by circular dichroism (CD) thermal  
11 denaturation<sup>36</sup>. Here too, we observed excellent agreement between these two methods,  
12 which both yielded  $T_m$  values for wt Im7 (~39 °C, **Supplementary Fig. 3c and d**) that  
13 agreed with a previously reported value<sup>35</sup>. Importantly, the presence of the small YebF  
14 domain did not significantly alter the  $T_m$  value for Im7 (**Supplementary Fig. 3d**),  
15 consistent with its lack of effect on ColE7-binding activity. We also confirmed that DSF  
16 results obtained using YebF-Im7 derived directly from cell-free supernatants were  
17 indistinguishable from those obtained with more extensively purified YebF-Im7  
18 (**Supplementary Fig. 3d**). Using DSF, the average  $T_m$  values for glycosylated and  
19 aglycosylated versions of each Im7 variant were measured, and the change in unfolding  
20 temperature,  $\Delta T_m$ , was calculated such that a positive  $\Delta T_m$  signified an increase in  
21 structural order and a reduced conformational flexibility due to appending a glycan.  
22 Several of the variants exhibited positive  $\Delta T_m$  values, with the largest increases  
23 corresponding to glycan installation at N33, N59, N60, N65 and N80 (**Fig. 3e**).  
24 Conversely, glycans at N10, N58, and N64 caused the largest decreases in  $T_m$ , indicative  
25 of glycan-induced protein structural changes that destabilized the protein.

26 To test whether protein-structure analyses could explain the observed effects of  
27 sequon substitution and glycosylation, we modeled the sequon-substituted variants and  
28 generated ensembles of glycan conformations for Im7 alone and in the context of Im7  
29 bound to E7. We calculated simple geometric measures (secondary structure, burial,  
30 distance to the binding site, and surface area) and Rosetta energy estimates (stability  
31 and interface score) (**Supplementary Figs. 4 and 5; Supplementary Results**).

1 Surprisingly, none of these factors correlated with either stability or activity of the  
2 aglycosylated or glycosylated Im7 constructs. Only the attractive van der Waals energy  
3 had a weak correlation with aglycosylated binding activity (**Supplementary Fig. 6**),  
4 possibly because of Im7's marginal stability and the known flexibility of helix  $\alpha 4$ <sup>37</sup>. The  
5 ensembles of glycan conformations for several glycovariants in the context of Im7 bound  
6 to E7 (**Supplementary Fig. 7**) indicated that (i) the glycan and the bound protein often  
7 interact to change the binding activity positively or negatively (**Supplementary Results**)  
8 and (ii) enhanced binding appears to be mediated by multiple low-energy glycan  
9 conformations making favorable interactions with E7.

10 **Extension of SSGM to a protein with more complex topology.** We next turned our  
11 attention to bovine RNase A. Like Im7, RNase A has been intensely studied from a  
12 structure–function standpoint and has been pivotal to understanding many aspects of  
13 enzymology, biological chemistry, and protein folding and stability. We chose RNase A  
14 because (i) it is a relatively small, basic protein, containing 124 residues but with a more  
15 complex topology than Im7, with all major types of secondary structure, namely  $\alpha$ -helices,  
16  $\beta$ -sheets, and turns, represented; (ii) the natively glycosylated form of RNase A, namely  
17 RNase B, contains a single *N*-linked oligosaccharide at N34 and a crystal structure is  
18 available<sup>38</sup>; (iii) glycosylation at N34 has no apparent effect on the secondary or tertiary  
19 structure<sup>38</sup> but does appear to alter the thermal stability<sup>39</sup> although this is controversial  
20<sup>40</sup>; and (iv) RNase A modified with an optimal bacterial sequon at the native N34  
21 glycosylation site (RNase A<sup>N34</sup>) can undergo *Cj*PglB-dependent glycosylation *in vivo* and  
22 *in vitro*<sup>32, 33</sup>. For these reasons, RNase A represented an ideal target for SSGM.

23 Extracellular secretion of glycosylated YebF-RNase A<sup>N34</sup> was observed in colony  
24 blots and immunoblots (**Fig. 2c**), confirming the compatibility of RNase A with glycoSNAP  
25 screening. An SSGM library was created by subjecting YebF-RNase A plasmid DNA to  
26 the multiplex inverse PCR method, after which glycoSNAP screening was performed  
27 using CLM24 cells carrying plasmids encoding the library and the *C. jejuni* glycosylation  
28 machinery. A total of ~100 glycosylation-positive colonies were randomly selected from  
29 two membranes and subjected to sequencing analysis. Of the 97 sequence-confirmed  
30 hits, only 50 were unique, as many of the sequences were isolated multiple times (*e.g.*,  
31 seven times each for RNase A<sup>N41</sup> and RNase A<sup>N122</sup>; **Fig. 4a**). The sequons of these hits

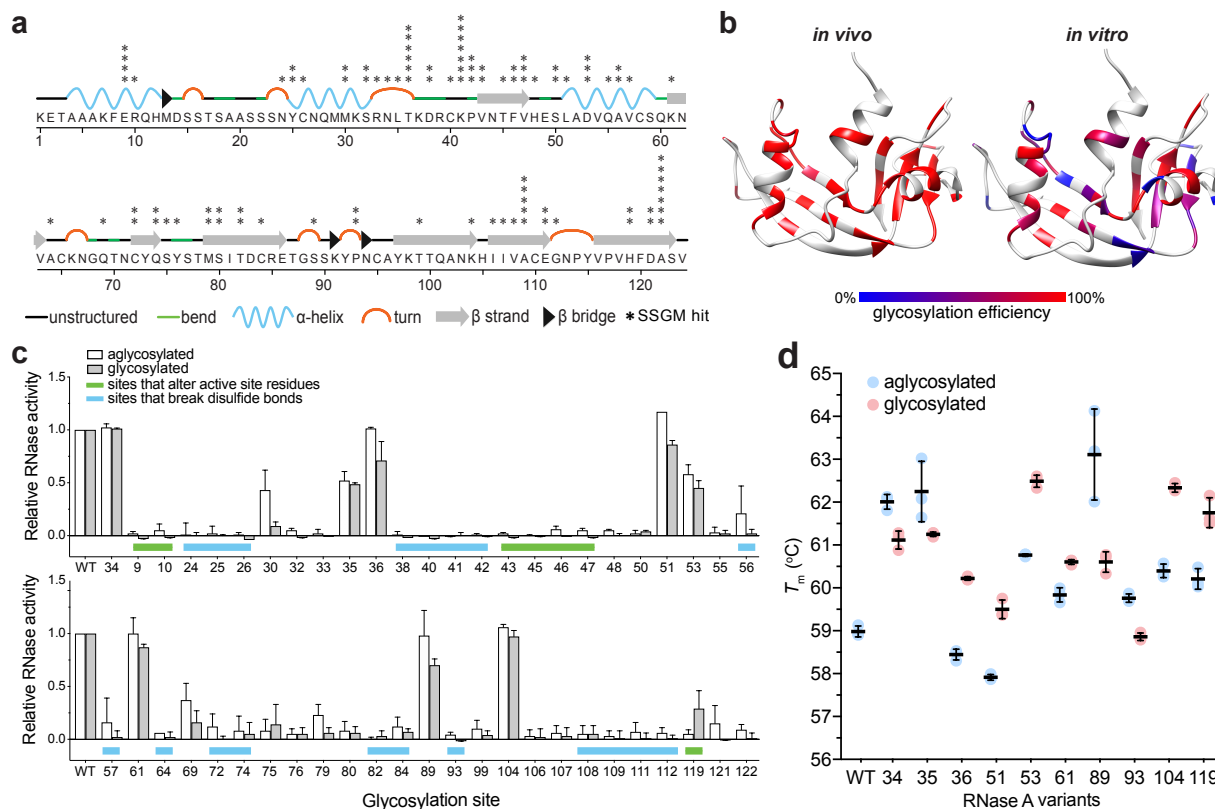

1  
2 **Figure 4. Glycomutagenesis of bovine pancreatic RNase A.** (a) Primary sequence and predicted  
3 secondary structure for bovine pancreatic RNase A. Asterisks denote location and frequency of glycosite  
4 hits isolated using SSGM. Predicted structures adapted from PDB ID 1RBX. (b) Mapping of *in vivo* (left)  
5 and *in vitro* (right) glycosylation efficiency onto three-dimensional structure of RNase A. Heatmap analysis  
6 of glycosylation efficiency was determined based on densitometric quantification of percent glycosylated  
7 (defined as  $g1/[g0+g1]$  ratio) for each acceptor protein in anti-His immunoblot. (c) Enzymatic activity of  
8 glycosylated (gray bars) and aglycosylated (white bars) RNase A variants recovered from culture  
9 supernatants. All data were normalized to binding activity measured for aglycosylated YebF-RNase A  
10 lacking a sequon (wt). Data are average of three biological replicates and error bars represent standard  
11 deviation of the mean. (d) DSF analysis of YebF-RNase A variants with and without glycosylation.  $T_m$   
12 was calculated as midpoint of thermal transition between native and unfolded states. Dashed line indicates  $T_m$   
13 for wt YebF-RNase A ( $59.0 \pm 0.1$  °C). Black bars are average of three independent replicates with error  
14 bars reported as standard error of the mean.

15  
16 were uniformly distributed throughout the primary sequence and found in every type of  
17 secondary structural element, akin to the results with Im7. Immunoblot analysis confirmed  
18 that all selected clones were glycosylated, and the efficiency for most was at or near  
19 100% as estimated by densitometry analysis of the anti-His blots (**Fig. 4b** and  
20 **Supplementary Fig. 8**). To investigate whether the structural context of the sequon  
21 impacted the possible timing of PglB-mediated glycan installation, we performed *in vitro*  
22 glycosylation of folded RNase A variants. While some of the variants were glycosylated

1 as efficiently *in vitro* as they were *in vivo* (e.g., RNase A<sup>N46</sup> and RNase A<sup>N64</sup>), an  
2 unexpectedly large number of variants showed significantly lower levels of glycosylation  
3 under *in vitro* conditions (**Fig. 4b** and **Supplementary Fig. 8**). Most notably among these  
4 were variants N34, N35, N36, N43, N51, N61, N69, N72, N80, N89, and N104, which  
5 were all efficiently glycosylated *in vivo* but underwent little or no detectable glycosylation  
6 *in vitro*. These sequons occur at locations that were likely to be accessible to the OST  
7 during translation/translocation when the proteins are unfolded but became inaccessible  
8 after the protein completed folding. Indeed, the native *N*-glycosylation site at N34 is  
9 located in a structured domain, suggesting that the poor *in vitro* glycosylation at this  
10 specific location (and perhaps also at the nearby N36 and N43 sites) was due to sequon  
11 inaccessibility in the folded state. Such folding-dependent recognition of this site has been  
12 observed previously<sup>32, 33</sup> and, together with the results presented here, supports a model  
13 whereby *in vivo* glycosylation of these particular sequons involves glycan installation prior  
14 to folding, either co- or post-translocationally (**Supplementary Fig. 2b**).

15 To determine the consequences of glycosylation at the 50 unique sites, the ability  
16 of glycosylated and aglycosylated versions of each sequon variant to catalyze the  
17 hydrolysis of the phosphodiester bonds in RNA was evaluated. While the addition of YebF  
18 had little to no effect on RNase A activity (**Supplementary Fig. 9a**), more than half of the  
19 RNase A variants were inactivated by substitution of the DQNAT sequon (**Fig. 4c**). To  
20 determine if this might be due to the substitution of five residues in the target protein, a  
21 requirement for optimal recognition by *Cj*PglB<sup>41</sup>, we mutated RNase A more  
22 conservatively at a select number of sites. Specifically, we generated minimal sequons  
23 (D-X-N-X-T/S or X-X-N-X-T/S, where X represents the native amino acid), which in most  
24 cases required only 1 or 2 amino acid changes. Each of these mutants was completely  
25 inactive except for RNase A<sup>N55</sup> with a DVNAT sequon, which showed some activity but  
26 was still significantly less active than the wt enzyme (**Supplementary Fig. 9b**). Hence,  
27 even relatively minor sequence perturbations at these positions, in addition to the less  
28 subtle substitution with DQNAT, were all capable of inactivating RNase A. More careful  
29 inspection revealed that the majority of variants with little to no activity corresponded to  
30 the substitution of sequons in locations that would be predicted to disrupt catalytically  
31 important residues or disulfide bonds (**Fig. 4c** and **Supplementary Results**).

1           Among the variants that retained function, only eight (sequons at N34, N35, N36,  
2 N51, N53, N61, N89, and N104) showed activity that was on par (>50%) with wt RNase  
3 A but none were more active than their aglycosylated counterpart (**Fig. 4c**). In the case  
4 of RNase A<sup>N119</sup>, introduction of the DQNAT sequence completely abrogated catalytic  
5 activity, consistent with previous findings that the relative activity of an H119N mutant was  
6 reduced to less than 1% of wt RNase A, with  $k_{cat}/K_M$  values reduced by 100- to 1000-fold  
7 depending on the substrate used<sup>42</sup>. Despite the importance of this residue for catalysis,  
8 glycosylation at this position partially restored enzymatic activity, indicating an *N*-glycan-  
9 dependent gain-of-function.

10           To determine whether glycosylation impacted stability, we again used DSF to  
11 analyze the most active RNase A glycovariants along with RNase A<sup>N93</sup>, which was  
12 randomly chosen as a representative inactive variant. The measured  $T_m$  values for wt  
13 YebF-RNase A and its unfused counterpart were both ~59 °C (**Supplementary Fig. 9c**),  
14 in close agreement with previous findings<sup>40</sup>, while the  $T_m$  values for all the YebF-RNase  
15 A variants spanned a range from 58–63 °C (**Fig. 4d**). Most exhibited positive  $\Delta T_m$  values  
16 compared to their aglycosylated counterpart, including the RNase A<sup>N119</sup> variant,  
17 suggesting that the restoration of activity caused by glycan attachment at N119 also  
18 served to stabilize the protein. In contrast, RNase A<sup>N89</sup> and RNase A<sup>N93</sup> exhibited large  
19 negative  $\Delta T_m$  values that coincided with slightly weakened activity due to glycan  
20 attachment in the case of N89 and complete inactivation in the case of N93.

21           Next, we measured geometries and calculated Rosetta metrics to determine the  
22 effect of sequon substitution and glycosylation on RNase A activity. For the activity of  
23 aglycosylated and glycosylated RNase A variants in the context of all seven metrics, the  
24 only weakly correlated metric was the total Rosetta energy score ( $R^2 = 0.14$  for  
25 aglycosylated activity and  $R^2 = 0.12$  for glycosylated activity; **Supplementary Figs. 4, 5**).  
26 These metrics may be less useful for RNase A because the activities are primarily  
27 explained by the disruption of the active site and the disulfide bonds, which are not  
28 captured in these metrics.

29 **Investigation of IgG variable domain glycosylation using SSGM.** We next  
30 investigated antibody variable domain glycosylation, a phenomenon that is observed for  
31 ~15% of serum IgGs and contributes to diversification of the B-cell antibody repertoire<sup>6</sup>.



1 Although glycan installation within the variable domains of Fab arms has been long  
2 known, the rules governing the selection of *N*-glycosylation sites in Fab domains that  
3 emerge during somatic hypermutation and the functional consequences of the attached  
4 glycans remain poorly understood. To systematically investigate this phenomenon using  
5 SSGM, the two variable domains, V<sub>H</sub> and V<sub>L</sub>, from the human anti-HER2 monoclonal  
6 antibody were joined by a flexible linker to form scFv-HER2 that was subsequently  
7 modified at its N-terminus with YebF and at its C-terminus with a DQNAT motif.  
8 Extracellular secretion of glycosylated YebF-scFv-HER2<sup>DQNAT</sup> was observed in colony  
9 blots and immunoblots (**Fig. 5a**), confirming the compatibility of scFv-HER2 with  
10 glycoSNAP screening. Because variable domain glycosylation was subject to selection  
11 mechanisms that depend on the nature of the antigen <sup>6</sup>, we modified the SSGM strategy  
12 to enable dual screening of glycosylation and antigen-binding activity by labeling colonies  
13 with SBA lectin and the extracellular domain (residues 1-652) of human HER2 (HER2-  
14 ED), which was avidly bound by scFv-HER2<sup>DQNAT</sup> fused to YebF (**Supplementary Fig.**  
15 **10a**). In this way, two-color screening could be used to identify colonies that were positive  
16 both for glycosylation and for antigen binding, as demonstrated with the YebF-scFv-  
17 HER2<sup>DQNAT</sup> construct (**Fig. 5a**). Next, we constructed and screened an SSGM library,  
18 after which two-color glycoSNAP screening was performed with CLM24 cells carrying  
19 plasmids encoding the library and the *C. jejuni* glycosylation machinery. A total of ~60  
20 dual-positive hits were isolated from membranes, of which 21 were determined to be non-  
21 redundant (*e.g.*, N58 in V<sub>L</sub> and N42 in V<sub>H</sub> were each isolated 12 times) (**Fig. 5b**) and  
22 subsequently confirmed for glycosylation by immunoblot analysis (**Supplementary Fig.**  
23 **10b**). The sequons of these hits were sparsely distributed throughout the primary  
24 sequence, with a large proportion clustering just after the second and third  
25 complementarity-determining regions (CDRs) of the V<sub>L</sub> domain and also in the flexible  
26 linker, suggesting a strong selection bias for specific sites that both tolerated glycosylation  
27 and retained function. Interestingly, a few of the identified sequons occurred in CDR2 of  
28 the V<sub>L</sub> domain and CDR1 and CDR2 of the V<sub>H</sub> domain, consistent with naturally occurring  
29 IgG repertoires in which *N*-glycosites were observed preferentially in the CDRs <sup>6</sup>.

30 In terms of function, all 21 scFv-HER2 glycovariants exhibited HER2-ED binding  
31 activity above background (**Fig. 5c**), which was expected given that the screening

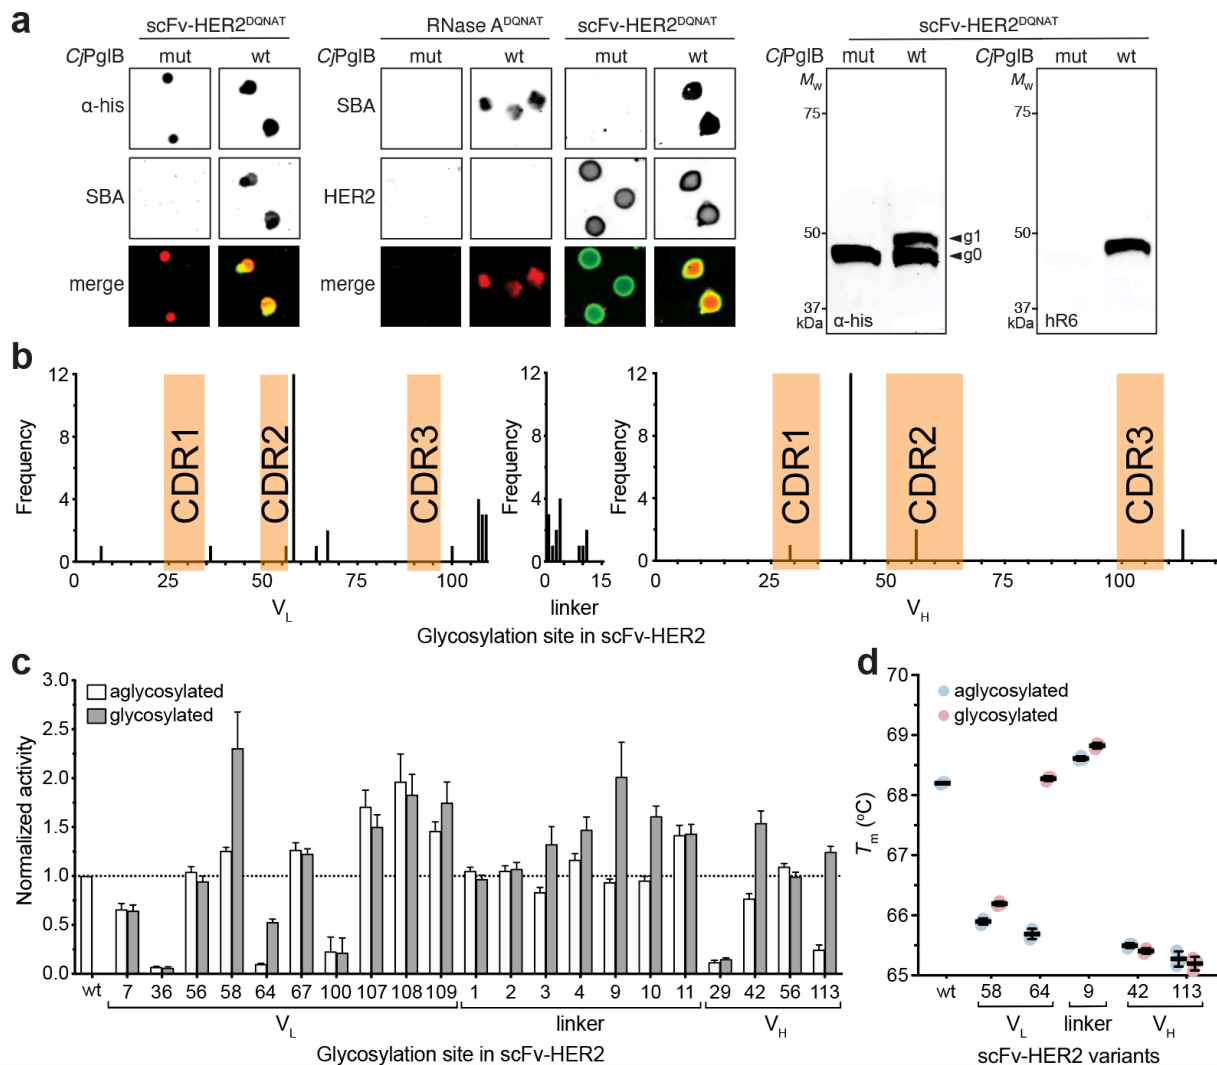

**Figure 5. Probing scFv antibody glycosylation using glycomutagenesis.** (a) Immunoblot analysis of acceptor proteins in colony secretions (left and middle) and periplasmic fractions (right) derived from *E. coli* CLM24 carrying plasmids encoding scFv-HER2<sup>DQNA^T</sup> and requisite *N*-glycosylation machinery with either wild-type C/PglB (wt) or an inactive mutant (mut). Blots were probed with anti-polyhistidine antibody (α-His) to detect acceptor protein, SBA or hR6 serum to detect the glycan, and HER2-ED to detect antibody binding. Bottom color panels depict overlay of α-His and SBA blots or SBA and HER2 blots (merge). Arrows denote aglycosylated (g0) and singly glycosylated (g1) forms of scFv-HER2<sup>DQNA^T</sup>. Molecular weight (*M<sub>w</sub>*) markers are indicated at left. Results are representative of at least three biological replicates. (b) Frequency and position of *N*-glycosylation sites in scFv-HER2<sup>DQNA^T</sup> glycovariants isolated using SSGM. (c) Binding activity of glycosylated (gray bars) and aglycosylated (white bars) scFv-HER2<sup>DQNA^T</sup> variants as measured by ELISA with HER2-ED as immobilized antigen. All data were normalized to binding activity measured for aglycosylated scFv-HER2 lacking a sequon (wt), such that values greater than 1 (denoted by dashed line) indicate enhanced binding activity relative to wt scFv-HER2. Data are average of three biological replicates and error bars represent standard deviation of the mean. (d) DSF analysis of YebF-scFv-HER2 variants with and without glycosylation. *T<sub>m</sub>* was calculated as midpoint of thermal transition between native and unfolded states. Dashed line indicates *T<sub>m</sub>* for wt YebF-scFv-HER2 (68.2 ± 0.1 °C). Black bars are average of three independent replicates with error bars reported as standard error of the mean.

1  
2  
3  
4  
5  
6  
7  
8  
9  
10  
11  
12  
13  
14  
15  
16  
17  
18  
19  
20  
21

1 process was adapted to include antigen binding. Importantly, nine of these glycovariants  
2 (N58, N64, and N109 in  $V_L$ ; N3, N4, N9, N10 in linker; N42 and N113 in  $V_H$ ) exhibited  
3 increased binding compared to their aglycosylated counterpart, and most of these were  
4 also more active than the parental scFv-HER2. For the five clones exhibiting the greatest  
5 increase in activity due to glycosylation, we measured  $T_m$  values and found that glycan  
6 attachment in general did not affect stability (**Fig. 5d**). However, the one exception was  
7 N64  $V_L$  which experienced a 2.6 °C increase in  $T_m$  due to the addition of the *N*-glycan.  
8 Overall, these results are in agreement with several previous studies showing that  
9 variable region glycans contribute to antibody binding characteristics and stability in a  
10 manner that depends on the precise location of the glycan<sup>6, 43</sup> and suggest that  
11 glycosylation in this region may be a useful strategy for fine-tuning the performance of  
12 IgG antibodies and their derivatives.

13 Next, we compared the experimental binding activity for scFv-HER2 with multiple  
14 geometric and Rosetta metrics. Unlike Im7 or RNase A, scFv-HER2 activity correlated  
15 with many of our metrics. First, sequon burial reduces the binding affinity of scFv-HER2  
16 for its antigen both in the aglycosylated ( $R^2 = 0.21$ ) and glycosylated states ( $R^2 = 0.43$ )  
17 (**Supplementary Fig. 4b** and **Fig. 6a**). Similarly, the closer the sequon was to the  
18 paratope, the greater the likelihood of reduced activity ( $R^2 = 0.20$  and 0.23 for the  
19 aglycosylated and glycosylated variants, respectively; **Supplementary Fig. 4c** and **Fig.**  
20 **6b**). The buried surface area correlated with the glycosylated state activity ( $R^2 = 0.19$ ,  
21 **Supplementary Fig. 5e**). The strongest predictors, however, were the Rosetta scores.  
22 The aglycosylated antibody–antigen complex total score correlated with experimental  
23 binding activity ( $R^2 = 0.49$ , **Supplementary Fig. 4f**). For the glycosylated state, the  
24 activity correlated with both the total Rosetta score ( $R^2 = 0.49$ , **Fig. 6c**) and the interface  
25 score ( $R^2 = 0.63$ , **Supplementary Fig. 5g**). These Rosetta scores are primarily driven by  
26 the van der Waals complementarity and to a lesser extent electrostatics (**Supplementary**  
27 **Figs. 6** and **11**).

28 For the aglycosylated activities, we selected three variants for deeper analysis: two  
29 variants that had low binding activity and a poor Rosetta score (N36  $V_L$ , N113  $V_H$ ; black  
30 circles in **Supplementary Fig. 6a**) and one variant with high activity and a favorable  
31 Rosetta score (N108  $V_L$ ; red circle in **Supplementary Fig. 6a**). Both N36  $V_L$  and N113

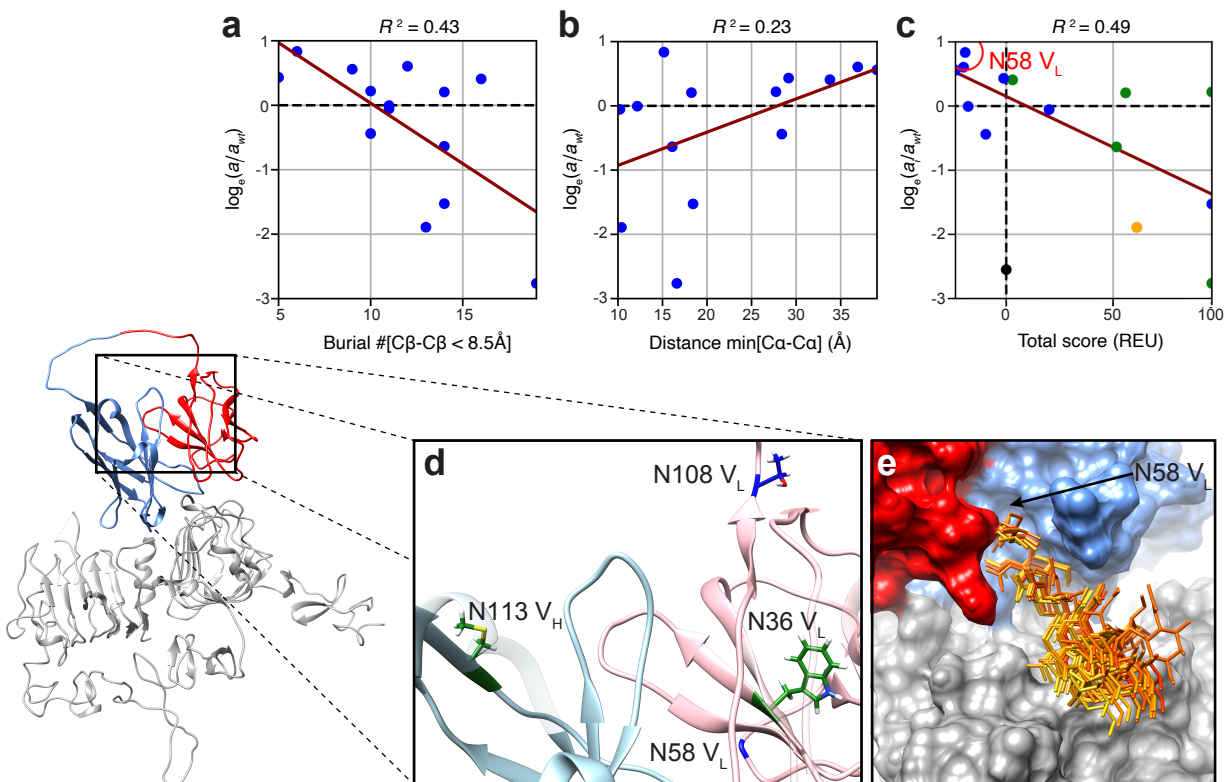

1  
2 **Figure 6: Quantitative analysis of scFv-HER2 variants.** The structure of scFv-HER2 V<sub>L</sub> (red) and V<sub>H</sub>  
3 (blue) domains in complex with HER2 protein (gray) is shown at bottom left. Regression analyses of log  
4 activity ratio (glycosylated / wild-type) versus (a) burial of sequon substitution site, (b) distance of closest  
5 HER2 residue from the sequon substitution site, and (c) total Rosetta score. In all three panels, the dark  
6 red lines are the respective regression lines. Colors of dots in (c) show the respective secondary structure  
7 of the sequon substitution site. Orange, green, and blue correspond to  $\alpha$ -helix,  $\beta$ -strand, and loop regions,  
8 respectively. N58 V<sub>L</sub> (red circle) has the highest glycosylated binding activity increase and is discussed in  
9 the text. (d) Wild-type representation of sites used for analysis of sequon substitution (36 V<sub>L</sub>, 108 V<sub>L</sub>, and  
10 113 V<sub>H</sub>) and glycosylation (58 V<sub>L</sub>). Side-chain colors reflect their respective secondary structures. (e) Glycan  
11 arrangement (orange sticks) from eight low energy conformations of glycosylated N58 V<sub>L</sub> variant of scFv-  
12 HER2, revealing possible glycan-HER2 interaction responsible for binding activity improvement.

13  
14 V<sub>H</sub> sites are situated on  $\beta$ -strands in compact regions of the anti-HER2 antibody on the  
15 side opposite the antigen-binding site (**Fig. 6d**, green sticks). The reduced stability arises  
16 from the steric clash of substituting a sequon inside (or near) a close-packed region of  
17 the protein (Rosetta terms for steric clashes (vdW\_rep) of 90.2 and 79.8 Rosetta energy  
18 units (REU) for the N36 V<sub>L</sub> and N113 V<sub>H</sub>, respectively). When glycosylated, the clashes  
19 worsen in the Rosetta models, corresponding to low activity (black circles in  
20 **Supplementary Fig. 6a**). On the other hand, site N108 V<sub>L</sub> is located at the C-terminal  
21 end of V<sub>H</sub> (**Fig. 6d**, blue sticks). Sequon substitution had a relatively small effect on the  
22 electrostatic interactions (-6.2 REU) and a greater effect on the repulsive van der Waals

1 terms (-28.0 REU), indicating that new side chains are acceptable in less compact  
2 regions. A similar outcome was reported following substitution mutation of a human  
3 monoclonal antibody <sup>44</sup>.

4 To understand how *N*-glycosylation was able to improve binding activity, we  
5 selected mutant N58 V<sub>L</sub> because the aglycosylated variant was 25.6% more active than  
6 the wt scFv-HER2 and glycan addition improves the binding an additional 1.83-fold.  
7 Residue N58 V<sub>L</sub> resides in the turn between strands 1 and 2 (**Fig. 6d**, blue backbone).  
8 From Rosetta-generated glycosylated structures, the low-energy states showed  
9 interfacial contacts between the glycan and the surface residues of HER2 (**Fig. 6e**),  
10 improving both the total Rosetta score and the interface score (red circle in **Fig. 6c** and  
11 **Supplementary Fig. 5g**) and explaining the binding activity improvement as resulting  
12 from favorable glycan-antigen contacts.

13

## 14 **Discussion**

15 In this study, we developed a new protein engineering workflow called SSGM that enables  
16 comprehensive mapping of the structural and functional consequences of site-specific  
17 glycan installation for any protein of interest. By combining synthetic glycosite libraries  
18 with a high-throughput screen for protein glycosylation <sup>20</sup>, we showed that a single SSGM  
19 experiment allowed the effects of many different site-directed glycan “mutations” to be  
20 probed for their contribution to the properties of a protein. In this way, SSGM is  
21 conceptually analogous to combinatorial alanine-scanning mutagenesis, which allows  
22 systematic determination of the importance of individual amino acids to protein structure  
23 and function <sup>17-19</sup>. Here, we demonstrated the utility and generality of the SSGM technique  
24 using three different acceptor proteins namely bacterial Im7, bovine RNase A, and human  
25 scFv-HER2. Consistent with the known modulatory effects of *N*-glycans <sup>4, 5</sup>, many  
26 glycovariants of these proteins exhibited detectably altered stability and activity that  
27 resulted from covalent attachment of *N*-glycans at precise locations in the protein  
28 backbone. Fine-mapping of these effects was made possible by systematic “sequon  
29 walking” experiments whereby a glycosylation site was introduced at every possible  
30 position of a protein, as we demonstrated for Im7. We imagine that sequon walking on a  
31 large, even proteome-wide, scale could provide access to datasets that might allow the

1 effects of glycosylation to be further generalized and predicted. Even though an  
2 unprecedentedly large number of intact glycoprotein variants (151 in total) were evaluated  
3 here, larger scale studies might require higher throughput techniques for resolving  
4 glycosylation efficiency such as recently described workflows that leverage mass  
5 spectrometry<sup>45,46</sup>. Nonetheless, the fact that *N*-glycan attachment significantly increased  
6 the binding activity of several Im7 and scFv-HER2 variants suggests that  
7 glycomutagenesis may become a useful tool for custom engineering of proteins with  
8 advantageous biophysical and biological properties.

9 A unique aspect of the SSGM method is the ability to generate combinatorial  
10 glycosite libraries and comprehensively assess which positions in a protein can tolerate  
11 glycan installation. The three proteins studied here were found to be efficiently *N*-  
12 glycosylated at an unexpectedly large number of positions and in all types of secondary  
13 structure although loops tended to be more receptive to glycosylation, consistent with the  
14 observation that naturally occurring *N*-glycans also exist on all forms of secondary  
15 structure<sup>31</sup>. Closer inspection of the data revealed some additional trends. For instance,  
16 installing *N*-glycans in the center of  $\alpha$ -helices negatively affected activity (*e.g.*, positions  
17 19, 42, 72 in Im7) whereas those installed at the transition between different types of  
18 secondary structure and at turns between motifs promoted enhanced activity and, in  
19 some cases, stability (*e.g.*, positions 33, 49, 58, 59, 60, 61, 65, 67, 68, 69, 78, 80 in Im7).  
20 These findings generally agreed with the folding and stability effects contributed by  
21 GlcNAc<sub>2</sub> disaccharide attachment to discrete locations in Im7<sup>16</sup> and also provide clues  
22 for why natural *N*-glycosylation sites occur with elevated frequency in turns and bends  
23 and especially at points of change in secondary structure and with low frequency within  
24 ordered helices<sup>31</sup>. Despite the overall agreement with previous studies, a few notable  
25 differences emerged. For example, in our hands, Im7 glycosylated at position 27 with the  
26 GalNAc<sub>5</sub>(Glc)GlcNAc heptasaccharide was more active but equally stable as its  
27 aglycosylated counterpart, whereas an EPL-derived Im7 modified with chitobiose at  
28 residue 27 was significantly more stable than unmodified Im7 (and activity data was not  
29 reported)<sup>16</sup>. Likewise, RNase A<sup>N34</sup> glycosylated with GalNAc<sub>5</sub>(Glc)GlcNAc exhibited  
30 activity that was nearly identical to that of aglycosylated RNase A<sup>N34</sup> (and wt RNase A),  
31 whereas the attachment of oligomannose glycans at N34 was previously observed to

1 reduce activity by more than threefold<sup>47</sup>. These discrepancies would suggest that distinct  
2 glycan structures (*i.e.*, GalNAc<sub>5</sub>(Glc)GlcNAc versus Man<sub>5-9</sub>GlcNAc<sub>2</sub> versus GlcNAc<sub>2</sub>)  
3 attached to the same site in RNase A have distinct effects. This is not entirely surprising  
4 in light of studies that have measured different biological and/or biophysical effects  
5 depending on the structure of the attached glycan<sup>48</sup>. Thus, in the future it will of interest  
6 to adapt SSGM for use with alternative glycan structures, including for example  
7 Man<sub>3</sub>GlcNAc<sub>2</sub> or other human *N*- and *O*-linked glycans that have been engineered in *E.*  
8 *coli*<sup>32, 49, 50</sup>, so that the consequences of varying glycan structures at discrete locations  
9 can be systematically investigated.

10 The studies performed here also provided insight on the possible timing and impact  
11 of glycosylation with respect to the folding process. For instance, Im7 tolerated a glycan  
12 at almost every position, even when the target asparagine side chain pointed inward and  
13 was considered buried (*e.g.*, positions N7, N68, and N76). Because these buried  
14 positions physically cannot be glycosylated by PglB when the target protein is in the folded  
15 state, they must either be glycosylated co-translationally or during a fluctuation to a  
16 partially unfolded state that provides access to that site. Then, after glycosylation,  
17 because Im7 presumably cannot fold back into the native structure, it must adopt a  
18 different conformation to accommodate the newly added glycan, which would be feasible  
19 in light of the fact that Im7 is very flexible<sup>37</sup>. In the case of RNase A, several sites were  
20 identified (*e.g.*, N34, N36) that could be efficiently glycosylated *in vivo* but underwent little  
21 to no glycosylation *in vitro* (in the already folded state), providing clear evidence for glycan  
22 installation prior to folding and in a manner that may resemble the co-translocational  
23 process in mammalian cells<sup>51</sup>. The overall less efficient glycosylation seen for many  
24 RNase A variants is also consistent with the protein adopting a more stable folded  
25 structure compared to Im7 and providing less accessibility to buried sites.

26 Using the results of the SSGM studies, we also investigated explanatory factors  
27 that could be used to predict *a priori* the functional effect of glycosylation from the  
28 sequence. Here, we tested four simple structural metrics (secondary structure, distance  
29 to the active site, burial of the glycosylation site in the native fold, and change in buried  
30 surface area upon binding) and the change in energy of the protein alone and in complex  
31 with its substrate upon addition of the glycan (estimated with Rosetta). Whereas RNase

1 A activity was more sensitive to sequon substitution than glycosylation, the effects of  
2 glycosylation on the function of Im7 and scFv-HER2 were quite interesting. Collectively,  
3 the results indicated that interactions between the glycan and the bound protein can alter  
4 binding activity (positively or negatively) and that enhanced binding likely arises from low-  
5 energy glycan conformations making favorable interactions with the binding partner. In  
6 the case of scFv-HER2, mutant N58 V<sub>L</sub> exhibited significantly higher binding activity  
7 compared to wt scFv-HER2. While part of the increase was from the sequon substitution  
8 alone, perhaps from the additional contacts of the long Q57 side chain or from a stabilizing  
9 effect of the sequon on the CDR L2 loop (residues 51-57 in V<sub>L</sub>), most of the effect was  
10 from the *N*-glycan itself. At residue N58 V<sub>L</sub>, the heptameric glycan creates new contacts  
11 between scFv-HER2 and HER2-ED and buries more surface area upon binding. Glycans  
12 attached near (but not within) the binding site have previously been reported to increase  
13 antigen-binding affinity<sup>52</sup>. In fact, the Im7 variant that underwent the largest increase in  
14 binding activity upon glycosylation (at residue N58 in Im7) also acquired new contacts  
15 with its binding partner, E7, through the glycan, which strengthened binding activity by  
16 3.5-fold. Thus, it is an intriguing possibility that binding affinity of a protein might be  
17 purposefully increased by rational introduction of *N*-glycans at predetermined locations,  
18 with SSGM serving as the discovery engine for precisely pinpointing the sites within a  
19 protein that lead to glycan-mediated affinity enhancement.

20

## 21 **Materials and Methods**

22 **Strains and culture conditions.** *E. coli* strain DH5 $\alpha$  was used for all molecular biology,  
23 including plasmid construction, site-directed mutagenesis, and SSGM library  
24 construction. BL21(DE3) was used to purify ColE7 that was used to measure Im7  
25 binding activity in ELISA format. All glycosylation studies were performed using *E. coli*  
26 strain CLM24<sup>53</sup>, which was initially grown at 37 °C in Luria–Bertani (LB) medium  
27 containing appropriate antibiotics at the following concentrations: 20  $\mu$ g/mL  
28 chloramphenicol (Cm), 100  $\mu$ g/mL trimethoprim (Tmp), and 50  $\mu$ g/mL spectinomycin  
29 (Spec). When cells reached mid-log phase, protein expression was induced by adding  
30 0.1 mM isopropyl- $\beta$ -D-thiogalactoside (IPTG) and 0.2% (v/v) L-arabinose, after which cells  
31 were grown at 30 °C for 16–20 h.



1 **Plasmid construction.** For expression of the glycosylation machinery, plasmid pMAF10  
2 encoding *Cj*PglB<sup>53</sup> along with either plasmid pMW07-pglΔB<sup>20</sup> or pMW07-pglΔBCDEF  
3 were used. The latter plasmid was constructed by deleting the *pglCDEF* genes from  
4 plasmid pMW07-pglΔB<sup>20</sup>, resulting in a “minimal” *C. jejuni* glycan biosynthesis pathway  
5 that excluded the *pglB* gene encoding the OST and also the *pglCDEF* genes encoding  
6 enzymes for synthesis and transfer of bacillosamine as described previously<sup>28</sup>. This  
7 deletion can be complemented by *E. coli* WecA, a sugar-phosphate transferase that  
8 transfers GlcNAc phosphate to undecaprenol phosphate, therefore initiating LLO  
9 biosynthesis. It should be noted that while pMW07-pglΔB encodes the bacillosaome-  
10 related *pglCDEF* genes, we did not detect the presence of bacillosamine in any of the  
11 glycoforms produced by cells carrying this plasmid. A derivative of pMAF10 that encoded  
12 a catalytically inactive version of *Cj*PglB carrying two active-site mutations (D54N and  
13 E316Q)<sup>20</sup> was used as a negative control. The plasmids pTrc99S-YebF-Im7 and  
14 pTrc99S-YebF-Im7<sup>DQNAT</sup> were constructed by inserting cloning cassettes YebF<sup>N24L</sup>-XbaI-  
15 Im7-Sall-FLAG-6xHis and YebF<sup>N24L</sup>-XbaI-Im7-BamHI-DQNAT-Sall-FLAG-6xHis,  
16 respectively, into the SacI and HindIII sites of pTrc99S<sup>54</sup>. The genes encoding RNase A  
17 and scFv-HER2 were PCR amplified from plasmids pTrc-ssDsbA-RNaseA<sup>20</sup> and  
18 pMAZ360-clgG-Herceptin<sup>55</sup>, respectively, and cloned into the cassette between XbaI  
19 and Sall sites in pTrc99S-YebF-Im7 or XbaI and BamHI sites in pTrc99S-YebF-Im7<sup>DQNAT</sup>,  
20 replacing Im7 and Im7<sup>DQNAT</sup>, respectively. The pTrc-spDsbA-POI plasmids (where POI  
21 corresponds to each of the proteins of interest, namely Im7, RNase A, and scFv-HER2)  
22 were cloned by one-step PCR integration of primers encoding the *E. coli* DsbA signal  
23 peptide (spDsbA) into each pTrc99S-YebF-POI plasmid as templates followed by Gibson  
24 assembly. PCR products were subjected to DpnI digestion to remove parental plasmid.  
25 The resulting PCR products were assembled by Gibson assembly and used to transform  
26 *E. coli* cells to obtain the desired plasmids. Plasmid pET28-ColE7 (H569A) was  
27 constructed by inserting DNA encoding the ColE7 H569A variant<sup>56</sup> bearing a C-terminal  
28 6xHis tag (Integrated DNA Technologies) into the NcoI and Sall sites of pET28a. All  
29 plasmids were confirmed by DNA sequencing at the Biotechnology Resource Center of  
30 the Cornell Institute of Biotechnology.

1 **SSGM library construction.** SSGM mutagenesis libraries were constructed by multiplex  
2 inverse PCR<sup>30</sup> followed by T4 ligation. Each of the pTrc99S-YebF-POI plasmids was  
3 used as template for PCR amplification using primer sets specifically designed such that  
4 the DNA sequence 5'-GAT CAG AAT GCG ACC-3' was included in the 5' end of every  
5 forward primer to enable substitution of the adjacent five amino acids with DQNAT. Prior  
6 to PCR, the forward primers were phosphorylated using T4 polynucleotide kinase (New  
7 England Biolabs) to facilitate T4 ligation later. PCR reactions were performed using  
8 Phusion polymerase (New England Biolabs), and the PCR products were gel-purified  
9 from the product mixtures with a ratio of 1:1 to get rid of non-specific PCR products. The  
10 resulting PCR products were self-assembled using T4 ligase (New England Biolabs) to  
11 obtain the desired SSGM plasmid libraries, which were subsequently used to transform  
12 highly competent DH5 $\alpha$  cells and then isolated using a QIAprep Spin Miniprep Kit  
13 (Qiagen) according to manufacturer's instructions.

14 **GlycoSNAP assay.** Screening of SSGM libraries was performed using glycoSNAP as  
15 described previously<sup>20</sup>. Briefly, *E. coli* strain CLM24 carrying pMW07-pgl $\Delta$ B and pMAF10  
16 was transformed with corresponding SSGM library plasmids, and the resulting  
17 transformants were grown on 150-mm LB-agar plates containing 20  $\mu$ g/mL Cm, 100  
18  $\mu$ g/mL Tmp, and 50  $\mu$ g/mL Spec overnight at 37 °C. The second day, nitrocellulose  
19 transfer membranes were cut to fit 150-mm plates and pre-wet with sterile phosphate-  
20 buffered saline (PBS) before placement onto LB-agar plates containing 20  $\mu$ g/mL Cm,  
21 100  $\mu$ g/mL Tmp, 50  $\mu$ g/mL Spec, 0.1 mM IPTG, and 0.2% (w/v) L-arabinose. Library  
22 transformants were replicated onto 142-mm cellulose nitrate membrane filters (Whatman,  
23 0.45  $\mu$ m), which were then placed colony-side-up on transfer membranes and incubated  
24 at 30 °C for 16 h. The nitrocellulose transfer membranes were washed in Tris-buffered  
25 saline (TBS) for 10 min, blocked in 5% bovine serum albumin for 30 min and probed for  
26 1 h with fluorescein-labeled SBA (Vector Laboratories, catalog # FL-1011) and Alexa  
27 Fluor 647<sup>®</sup> (AF647)-conjugated anti-His antibody (R&D Systems, catalog # IC0501R) or  
28 HER2-ED (R&D Systems, catalog # 10126-ER) that was conjugated with Alexa Fluor  
29 647<sup>™</sup> (AF647) (Thermo Fisher Scientific, catalog # A37573) following the manufacturer's  
30 instructions. All positive hits were re-streaked onto fresh LB-agar plates containing 20  
31  $\mu$ g/mL Cm, 100  $\mu$ g/mL Tmp, 50  $\mu$ g/mL Spec, and grown overnight at 37 °C. Individual

1 colonies were grown in liquid culture and subjected to DNA sequencing to confirm the  
2 location of glycosites and to protein glycosylation analysis as described below.

3 **Protein isolation.** For Western blot analysis and protein activity assays, cell-free culture  
4 supernatants were generated by subjecting 1.5 mL of cells that had been induced for 16  
5 h to centrifugation at  $13,4000 \times g$  at  $4^\circ\text{C}$  for 2 min. Periplasmic fractions were generated  
6 by subjecting 3 mL of 16-h-induced cultures to centrifugation at  $13,400 \times g$  for 2 min. The  
7 resulting pellets were resuspended in 300  $\mu\text{L}$  of 0.4 M arginine and incubated at  $4^\circ\text{C}$  for  
8 1 h with gentle shaking. After centrifugation at  $13,400 \times g$  for 2 min, the supernatant  
9 containing periplasmic extracts was collected. For stability assays, YebF-Im7, YebF-  
10 RNase A, and YebF-scFv-HER2 variants were purified from supernatant fractions and  
11 soluble lysate fractions. To prepare the latter, cells expressing YebF-RNase A variants  
12 were harvested by centrifugation at  $6000 \times g$  at  $4^\circ\text{C}$  for 20 min and the pellets were  
13 resuspended in PBS buffer supplemented with 10-mM imidazole followed by cell lysis  
14 using a Emulsiflex-C5 Homogenizer (Avestin) at 16,000–18,000 psi. The resulting lysate  
15 was clarified by centrifugation at  $15,000 \times g$  for 30 min at  $4^\circ\text{C}$  to collect the soluble  
16 fraction. All soluble fractions, or supernatant fractions supplemented with 10-mM  
17 imidazole, were then applied twice to a gravity flow column loaded with Ni-NTA resin at  
18 room temperature and washed with PBS containing 20-mM imidazole until the  
19 concentration was lower than 0.1 mg/mL. Proteins were eluted in 2.5 mL of PBS with 250  
20 mM imidazole. The eluted proteins were desalted using PD10 Desalting Columns (GE  
21 Healthcare) and stored at  $4^\circ\text{C}$ .

22 To produce Cole7 for ELISA experiments, an overnight culture BL21(DE3) cells  
23 carrying plasmid pET28a-Cole7 (H569A) was used to inoculate 1 L of LB supplemented  
24 with 50  $\mu\text{g}/\text{mL}$  kanamycin. Cells were grown at  $37^\circ\text{C}$  until mid-log phase and then were  
25 induced with 0.1 mM IPTG for 16 h at  $16^\circ\text{C}$  before being harvested. Following  
26 centrifugation at  $10,000 \times g$ , pellets were resuspended in PBS buffer supplemented with  
27 10-mM imidazole and lysed at 16,000–18,000 psi using an Emulsiflex-C5 homogenizer  
28 (Avestin). The lysate was clarified by centrifugation at  $15,000 \times g$  for 30 min at  $4^\circ\text{C}$  and  
29 the collected soluble fraction was mixed with Ni-NTA resin for 2 h at  $4^\circ\text{C}$ . The mixture  
30 was then applied to a gravity flow column and washed with 5 column volumes of PBS  
31 containing 20 mM imidazole. Proteins were eluted in 4 column volumes of PBS with 250-

1 mM imidazole. The eluted protein was desalted and concentrated to 5 mg/mL in PBS  
2 buffer using Ultra Centrifugal Filters with 10-kDa molecular weight cut-off (Amicon®) and  
3 stored at 4 °C.

4 **Western blotting analysis.** Supernatant or periplasmic fractions were diluted 3:1 in 4×  
5 Laemmli sample buffer (Bio-Rad) and were boiled at 100 °C for 10 min. The treated  
6 samples were subjected to SDS-polyacrylamide gel electrophoresis on 10% Mini-  
7 PROTEAN® TGX™ Precast Protein Gels (Bio-Rad). The separated protein samples  
8 were then transferred to nitrocellulose membranes. Following transfer, the membranes  
9 were blocked with 5% milk (w/v) in TBST (TBS, 0.1% Tween 20) and were probed with  
10 horseradish peroxidase (HRP) conjugated anti-His antibody (Abcam, catalog # ab1187)  
11 or the *C. jejuni* heptasaccharide glycan-specific antiserum hR6 for 1 h. For the latter, goat  
12 anti-rabbit IgG (HRP) (Abcam, catalog # ab205718) was used as the secondary antibody  
13 to detect hR6 antiserum. After washing three times with TBST for 10 min, the membranes  
14 were visualized using a ChemiDoc™ MP Imaging System (Bio-Rad).

15 **In vitro glycosylation.** Methods for purification of *C. jejuni* PglB and isolation of LLOs  
16 from glycoengineered *E. coli* were described previously<sup>57</sup>. *In vitro* glycosylation was  
17 carried out in 30-µL reactions containing either 20 µL of supernatant fraction containing  
18 aglycosylated YebF-Im7 or 20 µL of periplasmic fraction containing YebF-RNase A, 2 µg  
19 of purified CjPglB, and 5 µg extracted LLOs in *in vitro* glycosylation buffer (10-mM  
20 HEPES, pH 7.5, 10-mM MnCl<sub>2</sub>, and 0.1% (w/v) *n*-dodecyl-β-D-maltoside (DDM)).  
21 Reaction mixtures were incubated at 30 °C for 16 h and stopped by adding 10 µL of 4×  
22 Laemmli sample buffer containing 5% β-mercaptoethanol followed by boiling at 100 °C  
23 for 15 min, after which they were subjected to Western blot analysis.

24 **ELISA.** Binding activity for Im7 and scFv-HER2 was determined by standard ELISA.  
25 Briefly, Costar 96-well ELISA plates (Corning) were coated overnight at 4 °C with 50 µL  
26 of 5 µg/mL purified ColE7 in 0.05-M sodium carbonate buffer (pH 9.6) for Im7 variants  
27 and 50 µL of 0.2 µg/mL HER2-ED (Sino Biological, catalog # 10004-HCCH) in PBS buffer  
28 for scFv-HER2 variants. After blocking with 5% (w/v) non-fat milk in PBS for 1 h at room  
29 temperature, the plates were washed three times with PBST (PBS, 0.05% (v/v) Tween-  
30 20) and incubated with serially diluted aglycosylated and glycosylated YebF-Im7 and  
31 YebF-scFv-HER2 glycovariants for 1 h at room temperature. After washing three times

1 with PBST, 50  $\mu$ L of 1:2,500-diluted HRP-conjugated anti-DDDK tag antibody (Abcam,  
2 catalog # ab49763) for Im7 variants or 50  $\mu$ L of 1:5,000-diluted HRP-conjugated anti-  
3 6 $\times$ His tag antibody (Abcam, catalog # ab1187) for scFv-HER2 variants, both in 1% PBST,  
4 was added to each well for 1 h. Plates were washed three times and then developed using  
5 50  $\mu$ L 1-Step Ultra TMB-ELISA substrate solution (ThermoFisher).

6 **RNase A activity assay.** The enzymatic activity of RNase A variants was assayed using  
7 RNaseAlert<sup>®</sup>-1 Kit (Integrated DNA Technologies) according to the manufacturer's  
8 protocol. Each of the 80-times-diluted supernatant samples were normalized to have an  
9 OD<sub>600</sub> equivalent to the positive control strain expressing wt RNase A. Samples were then  
10 mixed with 20 pmol of RNase A substrate and 10  $\mu$ L of 10 $\times$  RNaseAlert Buffer and  
11 incubated in RNase-free black 96 well microplates (Fisher) at 37 °C for 30 min.  
12 Fluorescence values were measured at 490 nm/520 nm excitation/emission wavelengths.

13 **Thermal stability analysis.** Far-UV CD spectroscopy of purified Im7 (50-mM sodium  
14 phosphate, 400-mM sodium sulfate, pH 7.4) as a function of temperature was carried out  
15 in a 0.1-cm cuvette on a spectropolarimeter. Far-UV CD spectra were acquired between  
16 200 nm and 260 nm with a step resolution of 1 nm. Melting temperatures of purified  
17 glycovariants was determined using high-throughput DSF as previously described<sup>58</sup>.  
18 Briefly, 5–10  $\mu$ g of proteins were mixed with Protein Thermal Shift<sup>™</sup> Buffer and Protein  
19 Thermal Shift<sup>™</sup> Dye purchased as Protein Thermal Shift Dye Kit<sup>™</sup> (Thermo Fischer  
20 Scientific) according to manufacturer's instructions. A melting curve was generated by  
21 monitoring fluorescence at 465 nm/610 nm excitation/emission wavelengths while  
22 increasing temperature from 10 °C to 90 °C at a rate of 0.06 °C/s on an Applied Biosystem  
23 ViiA 7 instrument (Life Technologies). To calculate  $T_m$  values, the collected data were  
24 analyzed by nonlinear regression analysis using the Boltzmann equation in Prism 8.4.2  
25 (GraphPad).

26 **Mass spectrometry analysis of protein glycosylation.** Proteins samples (~2  $\mu$ g) were  
27 separated by SDS-PAGE gel and bands corresponding to glycosylated YebF-Im7<sup>DQ<sup>N</sup>A<sup>T</sup></sup>  
28 were excised and subjected to in-gel digestion by trypsin followed by extraction of tryptic  
29 peptides essentially as described<sup>50</sup>. Gel slices were washed and then destained by  
30 treatment with a 1:1 mixture of acetonitrile (Fisher Chemical) and 50 mM aqueous  
31 NH<sub>4</sub>HCO<sub>3</sub> followed by treatment with 100% acetonitrile. After destaining, gel pieces were

1 reduced and alkylated with 10 mM dithiothreitol (Roche) and 50 mM iodoacetamide  
2 (Acros Organics). The glycoproteins were directly digested by adding trypsin (w/w = 1:10)  
3 in 50 mM NH<sub>4</sub>HCO<sub>3</sub> to the gel pieces and incubating overnight at 37 °C. The tryptic  
4 peptides were extracted by 50% acetonitrile with 5% formic acid (Fisher Chemical) and  
5 75% acetonitrile with 5% formic acid. Extracted peptides were pooled and dried by  
6 SpeedVac. The tryptic peptides were suspended in 24 µL of 0.5% formic acid and 10 µL  
7 was injected into an UltiMate3000 RSLCnano (Dionex) coupled to an Orbitrap Fusion  
8 mass spectrometer (Thermo-Fisher Scientific) as described<sup>59</sup> with slight modifications.  
9 The peptides were injected onto a PepMap C18 RP nano trapping column (5 µm, 100 µm  
10 i.d x 20 mm) at 20 µL/min flow rate for rapid sample loading, and separated on an Acclaim  
11 PepMap C18 nano column (3 µm, 75 µm x 25cm, Thermo Fisher Scientific). The tryptic  
12 peptides were eluted in a 90 min gradient of 5% to 23% to 35% solvent B (95%  
13 acetonitrile, 0.1% formic acid) corresponding to 3 to 73 to 93 min, respectively, at 300  
14 nL/min. The 90-min gradient was followed by a 9-min ramping to 90% B, a 9-min hold at  
15 90% B and quick switch to 5% B and 95% solvent A (2% acetonitrile, 0.1% formic acid)  
16 for 1 min. The column was re-equilibrated with 95% A for 25 min prior to the next run. The  
17 Orbitrap Fusion was operated in positive ion mode with nanospray voltage set at 1.7 kV  
18 and source temperature at 275 °C. The MS survey scan was acquired at a resolving  
19 power of 120,000 (FWHM at *m/z* 200) across *m/z* 350-1800, which was followed by a “top  
20 speed” data-dependent electron-transfer dissociation (ETD) MS/MS scan (cycle time of 4  
21 s) supplemented with higher-energy collision dissociation (ETHcD) fragmentation  
22 workflow for precursor peptides with 3–6 charges. ETHcD fragmentation was acquired  
23 using calibrated charge-dependent ETD parameters supplemented with 15% collisional  
24 energy in ion trap detector with Automatic Gain Control (AGC) of 3e4 and maximum  
25 injection time of 118 s.

26 Data analysis was performed by Byonic v3.6 (Protein Metrics) searching software  
27 against an *E. coli* database containing the YebF-Im7 protein, and an in-house generated  
28 *N*-linked glycan database with additional diBacNAc-containing glycans. The peptide  
29 search parameters were as follows: two missed cleavage for full trypsin digestion with  
30 fixed carbamidomethyl modification of cysteine and Q to Pyro-E on N-terminal Q, variable  
31 modifications of methionine oxidation and deamidation on asparagine/glutamine

1 residues. The peptide mass tolerance was 10 ppm and fragment mass tolerance values  
2 for EThcD spectra was 0.6 Da. Both the maximum number of common and rare  
3 modifications were set at two. Identified peptides and glycopeptides were filtered for a  
4 [log Prob] value >3 and glycopeptide mass error <5 ppm. The search results were  
5 exported to excel files for final analysis and graphical presentation.

6 **Protein structure preparation.** Initial coordinates of structures used for analysis were  
7 obtained from the Protein Data Bank at RCSB.org as follows: the Im7–E7 complex (PDB:  
8 2JBG), RNase A bound to four-nucleotide-long DNA (PDB: 1RCN, DNA: ATAA) and the  
9 scFv-Her2–ErbB2 complex (PDB: 3WSQ). For RNase A, we modeled an eight-  
10 nucleotide-long RNA at the same binding site of the DNA. We used X3DNA<sup>60</sup> to identify  
11 nucleotide arrangement parameters from DNA, as a template, to model RNA. We  
12 replaced the thymine residue of bound DNA with its RNA counterpart uracil. Since an  
13 initial analysis showed that four-nucleotide-long RNA is small for an interface-interaction  
14 calculation, we added two extra nucleotides to both ends of the modeled RNA to make it  
15 eight nucleotides long. Finally, to remove any unwanted clashes coming from the base  
16 sugar (deoxyribose to ribose) and the nucleotide change (thymine to uracil), we used the  
17 Rosetta relax protocol with a restraint on protein backbone atoms to generate a pool of  
18 100 RNA–protein structures (“decoys”). By manual inspection, we removed decoys  
19 showing RNAs outside of the binding site of RNase A. From the pool of remaining  
20 structures, we selected a candidate with the best Rosetta score for our study.

21 **Geometric calculations.** Secondary structure was identified using the DSSP protocol in  
22 PyRosetta<sup>61</sup>. Burial of a glycosylated residue was represented by a count of C<sub>β</sub> atoms  
23 within 8.5 Å from the C<sub>β</sub> atom of the selected amino acid residue (C<sub>α</sub> for alanine). The  
24 distance of a glycosylated residue from its binding partner was estimated by the C<sub>α</sub>–C<sub>α</sub>  
25 distance from the glycosylated residue to the closest residue of the binding partner. For  
26 RNase A, the distance of glycosylated residue from the active site residue His-119 was  
27 used instead, as RNase A does not bind to a protein. This distance was used for both the  
28 “activity ratio” and the “activity improvement probability” analyses. Interface solvent-  
29 accessible surface area (SASA) was measured using the Rosetta interface analyzer<sup>62</sup>.

30 **Rosetta measures.** Rosetta’s REF15 score function<sup>22</sup> was used to estimate the stability  
31 of a protein–protein complex. An upper-bound cutoff of 100 REU is used to limit the effect

1 of bad conformers on the correlation, while for Im7, this value was 60 REU. To represent  
2 the binding energy of a complex, the interface score was calculated with the Rosetta  
3 Interface Analyzer <sup>62</sup> by subtracting the score of the separated monomers from the  
4 complex.

5 **Rosetta protocols for sequon substitution and glycomutagenesis.** We used the  
6 RosettaCarbohydrate framework <sup>23</sup> and a new glycomutagenesis protocol to input a wt  
7 PDB file and generate all possible sequon-substituted variants and glycosylated variants.  
8 Coordinate files after sequon substitution and side chain optimization steps were used as  
9 aglycosylated variants for analysis. Calculations were carried out in Rosetta release  
10 version 2020.06 and PyRosetta4 release 247 ([www.rosettacommons.org](http://www.rosettacommons.org)). The command  
11 line for the glycomutagenesis calculation was:

```
12 glycomutagenesis.linuxgccrelease -in:file:s <PDB> -include_sugars  
13 -nstruct <length of sequence selected for glycomutagenesis>  
14 -n_cycles 100 -out:path:pdb ./output -out:path:score ./output
```

15 The command line for the relaxation runs was:

```
16 relax.linuxgccrelease -s <PDB> -nstruct 100  
17 -relax:default_repeats 5  
18 -relax:bb_move false  
19 -out:path:pdb ./output_relax -out:path:score ./output_relax
```

20 The command for analyzing aglycosylated structures was:

```
21 InterfaceAnalyzer.default.linuxgccrelease -s <PDB>  
22 -interface A_B #(For chain A and B)  
23 -out:path:pdb ./output -out:path:score ./output
```

24 and the command for glycosylated structures was:

```
25 InterfaceAnalyzer.default.linuxgccrelease -s <pdb file>  
26 -interface AB_C #(For [protein A + Glycan B] and Protein C)  
27 -fixedchains A B #(For Protein A + Glycan B)  
28 -out:path:pdb ./output -out:path:score ./output
```

29  
30 **Acknowledgements.** We thank Markus Aebi for providing strain CLM24 and hR6 serum  
31 used in this work. The authors also thank Mike Jewett, Milan Mrksich, Eric Sundberg,  
32 Sophia Hulbert, José-Marc Techner, Weston Kightlinger, Liang Lin, Jessica Stark, and  
33 Sai Pooja Mahajan for helpful discussions of the manuscript. This work was supported by  
34 the Defense Threat Reduction Agency (HDTRA1-15-10052 and HDTRA1-20-10004 to



1 M.P.D.), National Science Foundation (CBET-1159581, CBET-1264701, CBET-1936823  
2 to M.P.D.), and National Institutes of Health (1R01GM137314 to M.P.D., 1R01GM127578  
3 to M.P.D. and J.J.G., and 1S10 OD017992-01 to S.Z.). The work was also supported by  
4 seed project funding (to M.P.D.) through the National Institutes of Health-funded Cornell  
5 Center on the Physics of Cancer Metabolism (supporting grant 1U54CA210184). The  
6 content is solely the responsibility of the authors and does not necessarily represent the  
7 official views of the National Cancer Institute or the National Institutes of Health. T.J. was  
8 supported by a Royal Thai Government Fellowship and also a Cornell Fleming Graduate  
9 Scholarship.

10

11 **Author Contributions.** M.L. and X.Z. designed and performed all research, analyzed all  
12 data, and wrote the paper. S.S., T.J., I.K., J.B., E.C.C., J.W.L., and J.J.G. designed and  
13 performed research, and analyzed data. M.P.D. directed research, analyzed data, and  
14 wrote the paper.

15

16 **Data availability.** All data generated or analyzed during this study are included in this  
17 article (and its supplementary information) or are available from the corresponding  
18 authors on reasonable request.

19

20 **Competing Interests.** M.P.D. has a financial interest in Ajuta Therapeutics, Inc.,  
21 Glycobia, Inc., SwiftScale Biologics, Inc., and Versatope, Inc. M.P.D.'s interests are  
22 reviewed and managed by Cornell University in accordance with their conflict of interest  
23 policies. J.J.G. is an unpaid board member of the Rosetta Commons. Under institutional  
24 participation agreements between the University of Washington, acting on behalf of the  
25 Rosetta Commons, Johns Hopkins University may be entitled to a portion of revenue  
26 received on licensing Rosetta software including some methods developed in this article.  
27 As a member of the Scientific Advisory Board, J.J.G. has a financial interest in Cyrus  
28 Biotechnology. Cyrus Biotechnology distributes the Rosetta software, which may include  
29 methods mentioned in this article. J.J.G.'s arrangements have been reviewed and  
30 approved by the Johns Hopkins University in accordance with its conflict of interest  
31 policies. All other authors declare no competing interests.

## 1 References

- 2 1. Khoury, G.A., Baliban, R.C. & Floudas, C.A. Proteome-wide post-translational  
3 modification statistics: frequency analysis and curation of the swiss-prot  
4 database. *Sci Rep* **1** (2011).
- 5 2. Walsh, C.T., Garneau-Tsodikova, S. & Gatto, G.J., Jr. Protein posttranslational  
6 modifications: the chemistry of proteome diversifications. *Angew Chem Int Ed*  
7 *Engl* **44**, 7342-7372 (2005).
- 8 3. Abu-Qarn, M., Eichler, J. & Sharon, N. Not just for Eukarya anymore: protein  
9 glycosylation in Bacteria and Archaea. *Curr Opin Struct Biol* **18**, 544-550 (2008).
- 10 4. Varki, A. Biological roles of glycans. *Glycobiology* **27**, 3-49 (2017).
- 11 5. Mitra, N., Sinha, S., Ramya, T.N. & Surolia, A. N-linked oligosaccharides as  
12 outfitters for glycoprotein folding, form and function. *Trends Biochem Sci* **31**, 156-  
13 163 (2006).
- 14 6. van de Bovenkamp, F.S. et al. Adaptive antibody diversification through N-linked  
15 glycosylation of the immunoglobulin variable region. *Proc Natl Acad Sci U S A*  
16 **115**, 1901-1906 (2018).
- 17 7. Beckham, G.T. et al. Harnessing glycosylation to improve cellulase activity. *Curr*  
18 *Opin Biotechnol* **23**, 338-345 (2012).
- 19 8. Wang, L.X., Tong, X., Li, C., Giddens, J.P. & Li, T. Glycoengineering of antibodies  
20 for modulating functions. *Annu Rev Biochem* **88**, 433-459 (2019).
- 21 9. Berti, F. & Adamo, R. Antimicrobial glycoconjugate vaccines: an overview of classic  
22 and modern approaches for protein modification. *Chem Soc Rev* **47**, 9015-9025  
23 (2018).
- 24 10. Van Landuyt, L., Lonigro, C., Meuris, L. & Callewaert, N. Customized protein  
25 glycosylation to improve biopharmaceutical function and targeting. *Curr Opin*  
26 *Biotechnol* **60**, 17-28 (2019).
- 27 11. Rich, J.R. & Withers, S.G. Emerging methods for the production of homogeneous  
28 human glycoproteins. *Nat Chem Biol* **5**, 206-215 (2009).
- 29 12. Bosques, C.J., Tschampel, S.M., Woods, R.J. & Imperiali, B. Effects of  
30 glycosylation on peptide conformation: a synergistic experimental and  
31 computational study. *J Am Chem Soc* **126**, 8421-8425 (2004).
- 32 13. Shental-Bechor, D. & Levy, Y. Effect of glycosylation on protein folding: a close look  
33 at thermodynamic stabilization. *Proc Natl Acad Sci U S A* **105**, 8256-8261 (2008).
- 34 14. Buskas, T., Ingale, S. & Boons, G.J. Glycopeptides as versatile tools for  
35 glycobiology. *Glycobiology* **16**, 113R-136R (2006).
- 36 15. Payne, R.J. & Wong, C.H. Advances in chemical ligation strategies for the  
37 synthesis of glycopeptides and glycoproteins. *Chem Commun (Camb)* **46**, 21-43  
38 (2010).
- 39 16. Chen, M.M. et al. Perturbing the folding energy landscape of the bacterial immunity  
40 protein Im7 by site-specific N-linked glycosylation. *Proc Natl Acad Sci U S A* **107**,  
41 22528-22533 (2010).
- 42 17. Morrison, K.L. & Weiss, G.A. Combinatorial alanine-scanning. *Curr Opin Chem Biol*  
43 **5**, 302-307 (2001).
- 44 18. Weiss, G.A., Watanabe, C.K., Zhong, A., Goddard, A. & Sidhu, S.S. Rapid mapping  
45 of protein functional epitopes by combinatorial alanine scanning. *Proc Natl Acad*  
46 *Sci U S A* **97**, 8950-8954 (2000).

- 1 19. Gregoret, L.M. & Sauer, R.T. Additivity of mutant effects assessed by binomial  
2 mutagenesis. *Proc Natl Acad Sci U S A* **90**, 4246-4250 (1993).
- 3 20. Ollis, A.A., Zhang, S., Fisher, A.C. & DeLisa, M.P. Engineered  
4 oligosaccharyltransferases with greatly relaxed acceptor-site specificity. *Nat*  
5 *Chem Biol* **10**, 816-822 (2014).
- 6 21. Zhang, G., Brokx, S. & Weiner, J.H. Extracellular accumulation of recombinant  
7 proteins fused to the carrier protein YebF in Escherichia coli. *Nat Biotechnol* **24**,  
8 100-104 (2006).
- 9 22. Alford, R.F. et al. The Rosetta All-Atom Energy Function for Macromolecular  
10 Modeling and Design. *J Chem Theory Comput* **13**, 3031-3048 (2017).
- 11 23. Labonte, J.W., Adolf-Bryfogle, J., Schief, W.R. & Gray, J.J. Residue-centric  
12 modeling and design of saccharide and glycoconjugate structures. *J Comput*  
13 *Chem* **38**, 276-287 (2017).
- 14 24. Mansell, T.J., Guarino, C. & DeLisa, M.P. Engineered genetic selection links in vivo  
15 protein folding and stability with asparagine-linked glycosylation. *Biotechnol J* **8**,  
16 1445-1451 (2013).
- 17 25. Dennis, C.A. et al. A structural comparison of the colicin immunity proteins Im7 and  
18 Im9 gives new insights into the molecular determinants of immunity-protein  
19 specificity. *Biochem J* **333** ( Pt 1), 183-191 (1998).
- 20 26. Ko, T.P., Liao, C.C., Ku, W.Y., Chak, K.F. & Yuan, H.S. The crystal structure of the  
21 DNase domain of colicin E7 in complex with its inhibitor Im7 protein. *Structure* **7**,  
22 91-102 (1999).
- 23 27. Fisher, A.C. et al. Production of secretory and extracellular N-linked glycoproteins in  
24 Escherichia coli. *Appl Environ Microbiol* **77**, 871-881 (2011).
- 25 28. Yates, L.E. et al. Glyco-recoded Escherichia coli: Recombineering-based genome  
26 editing of native polysaccharide biosynthesis gene clusters. *Metab Eng* **53**, 59-68  
27 (2019).
- 28 29. Wacker, M. et al. N-linked glycosylation in Campylobacter jejuni and its functional  
29 transfer into E. coli. *Science* **298**, 1790-1793 (2002).
- 30 30. Kanwar, M., Wright, R.C., Date, A., Tullman, J. & Ostermeier, M. Protein switch  
31 engineering by domain insertion. *Methods Enzymol* **523**, 369-388 (2013).
- 32 31. Petrescu, A.J., Milac, A.L., Petrescu, S.M., Dwek, R.A. & Wormald, M.R. Statistical  
33 analysis of the protein environment of N-glycosylation sites: implications for  
34 occupancy, structure, and folding. *Glycobiology* **14**, 103-114 (2004).
- 35 32. Valderrama-Rincon, J.D. et al. An engineered eukaryotic protein glycosylation  
36 pathway in Escherichia coli. *Nat Chem Biol* **8**, 434-436 (2012).
- 37 33. Kowarik, M. et al. N-linked glycosylation of folded proteins by the bacterial  
38 oligosaccharyltransferase. *Science* **314**, 1148-1150 (2006).
- 39 34. Silverman, J.M. & Imperiali, B. Bacterial N-glycosylation efficiency is dependent on  
40 the structural context of target sequons. *J Biol Chem* **291**, 22001-22010 (2016).
- 41 35. Juraja, S.M. et al. Engineering of the Escherichia coli Im7 immunity protein as a  
42 loop display scaffold. *Protein Eng Des Sel* **19**, 231-244 (2006).
- 43 36. Lavinder, J.J., Hari, S.B., Sullivan, B.J. & Magliery, T.J. High-throughput thermal  
44 scanning: a general, rapid dye-binding thermal shift screen for protein  
45 engineering. *J Am Chem Soc* **131**, 3794-3795 (2009).

- 1 37. Whittaker, S.B., Spence, G.R., Gunter Grossmann, J., Radford, S.E. & Moore, G.R.  
2 NMR analysis of the conformational properties of the trapped on-pathway folding  
3 intermediate of the bacterial immunity protein Im7. *J Mol Biol* **366**, 1001-1015  
4 (2007).
- 5 38. Williams, R.L., Greene, S.M. & McPherson, A. The crystal structure of ribonuclease  
6 B at 2.5-Å resolution. *J Biol Chem* **262**, 16020-16031 (1987).
- 7 39. Arnold, U. & Ulbrich-Hofmann, R. Kinetic and thermodynamic thermal stabilities of  
8 ribonuclease A and ribonuclease B. *Biochemistry* **36**, 2166-2172 (1997).
- 9 40. Grafl, R., Lang, K., Vogl, H. & Schmid, F.X. The mechanism of folding of pancreatic  
10 ribonucleases is independent of the presence of covalently linked carbohydrate.  
11 *J Biol Chem* **262**, 10624-10629 (1987).
- 12 41. Chen, M.M., Glover, K.J. & Imperiali, B. From peptide to protein: comparative  
13 analysis of the substrate specificity of N-linked glycosylation in *C. jejuni*.  
14 *Biochemistry* **46**, 5579-5585 (2007).
- 15 42. Panov, K.I. et al. Ribonuclease A mutant His119 Asn: the role of histidine in  
16 catalysis. *FEBS Lett* **398**, 57-60 (1996).
- 17 43. van de Bovenkamp, F.S. et al. Variable domain N-linked glycans acquired during  
18 antigen-specific immune responses can contribute to immunoglobulin G antibody  
19 stability. *Front Immunol* **9**, 740 (2018).
- 20 44. Krause, J.C. et al. An insertion mutation that distorts antibody binding site  
21 architecture enhances function of a human antibody. *mBio* **2**, e00345-00310  
22 (2011).
- 23 45. Kightlinger, W. et al. Design of glycosylation sites by rapid synthesis and analysis of  
24 glycosyltransferases. *Nat Chem Biol* **14**, 627-635 (2018).
- 25 46. Techner, J.M. et al. High-throughput synthesis and analysis of intact glycoproteins  
26 using SAMDI-MS. *Anal Chem* **92**, 1963-1971 (2020).
- 27 47. Rudd, P.M. et al. Glycoforms modify the dynamic stability and functional activity of  
28 an enzyme. *Biochemistry* **33**, 17-22 (1994).
- 29 48. Hanson, S.R. et al. The core trisaccharide of an N-linked glycoprotein intrinsically  
30 accelerates folding and enhances stability. *Proc Natl Acad Sci U S A* **106**, 3131-  
31 3136 (2009).
- 32 49. Kightlinger, W. et al. A cell-free biosynthesis platform for modular construction of  
33 protein glycosylation pathways. *Nat Commun* **10**, 5404 (2019).
- 34 50. Natarajan, A. et al. Engineering orthogonal human O-linked glycoprotein  
35 biosynthesis in bacteria. *Nat Chem Biol* **16**, 1062-1070 (2020).
- 36 51. Ruiz-Canada, C., Kelleher, D.J. & Gilmore, R. Cotranslational and posttranslational  
37 N-glycosylation of polypeptides by distinct mammalian OST isoforms. *Cell* **136**,  
38 272-283 (2009).
- 39 52. van de Bovenkamp, F.S., Hafkenscheid, L., Rispens, T. & Rombouts, Y. The  
40 emerging importance of IgG Fab glycosylation in immunity. *J Immunol* **196**, 1435-  
41 1441 (2016).
- 42 53. Feldman, M.F. et al. Engineering N-linked protein glycosylation with diverse O  
43 antigen lipopolysaccharide structures in *Escherichia coli*. *Proc Natl Acad Sci U S*  
44 *A* **102**, 3016-3021 (2005).
- 45 54. Ollis, A.A. et al. Substitute sweeteners: diverse bacterial oligosaccharyltransferases  
46 with unique N-glycosylation site preferences. *Sci Rep* **5**, 15237 (2015).

- 1 55. Robinson, M.P. et al. Efficient expression of full-length antibodies in the cytoplasm  
2 of engineered bacteria. *Nat Commun* **6**, 8072 (2015).
- 3 56. Kortemme, T. et al. Computational redesign of protein-protein interaction specificity.  
4 *Nat Struct Mol Biol* **11**, 371-379 (2004).
- 5 57. Jaroentomeechai, T. et al. Single-pot glycoprotein biosynthesis using a cell-free  
6 transcription-translation system enriched with glycosylation machinery. *Nat*  
7 *Commun* **9**, 2686 (2018).
- 8 58. Ericsson, U.B., Hallberg, B.M., Detitta, G.T., Dekker, N. & Nordlund, P.  
9 Thermofluor-based high-throughput stability optimization of proteins for structural  
10 studies. *Anal Biochem* **357**, 289-298 (2006).
- 11 59. Song, M. et al. IRE1alpha-XBP1 controls T cell function in ovarian cancer by  
12 regulating mitochondrial activity. *Nature* **562**, 423-428 (2018).
- 13 60. Lu, X.J. & Olson, W.K. 3DNA: a software package for the analysis, rebuilding and  
14 visualization of three-dimensional nucleic acid structures. *Nucleic Acids Res* **31**,  
15 5108-5121 (2003).
- 16 61. Chaudhury, S., Lyskov, S. & Gray, J.J. PyRosetta: a script-based interface for  
17 implementing molecular modeling algorithms using Rosetta. *Bioinformatics* **26**,  
18 689-691 (2010).
- 19 62. Stranges, P.B. & Kuhlman, B. A comparison of successful and failed protein  
20 interface designs highlights the challenges of designing buried hydrogen bonds.  
21 *Protein Sci* **22**, 74-82 (2013).
